# Supplementary material for: Stability Study of Alpinia galanga Constituents and Investigation of Their Membrane Permeability by ChemGPS-NP and the Parallel Artificial Membrane Permeability Assay
Source: MDPI journal article supplement (doi:10.3390/pharmaceutics14091967), 2022-09-18
Supplement: s1 [file s1]

# Supplementary Materials: Stability Study of *Alpinia galanga* Constituents and Investigation of their Membrane Permeability by ChemGPS-NP and the Parallel Artificial Membrane Permeability Assay

Alexandra Simon<sup>1,\*</sup>, Kim Szofi Nghiem<sup>1</sup>, Nóra Gampe<sup>1</sup>, Zsófia Garádi<sup>1</sup>, Imre Boldizsár<sup>1,2</sup>, Anders Baklund<sup>3</sup>, András Darcsi<sup>1,4</sup>, Andrea Nedves<sup>1</sup>, Eszter Riethmüller<sup>1,\*</sup>

## Extraction and isolation

For isolation purposes 200 g dried, powdered rhizomes were extracted with 2000 mL ethyl acetate in ultrasonic bath at room temperature for 8 hours. The extract was subjected to Kieselgel 60 column chromatography (38 cm x 2.7 cm) and eluted with a gradient of hexane and ethyl acetate (from 100:0 v/v to 0:100 v/v ethyl acetate in 20 column volumes). Compound **9** (421 mg) was isolated this way with the purity of 99.1% (UHPLC-DAD). For further isolation purposes, another 200 g drug was extracted by the aforementioned method. The extract was separated by flash chromatography (CombiFlash Nextgen 300+, Teledyne Isco, USA) on a RediSep Rf Gold<sup>®</sup> 15.5 g Reversed-phase C18 column (Teledyne Isco, USA) eluting with a gradient using 0.1% formic acid in water as eluent A and acetonitrile as eluent B (from 100:0 v/v in 2 min, to 0:100 v/v in 28 min and 0:100 v/v in 15 min, with a flow rate of 10 mL/min). Ten fractions (A-H) were obtained on the basis of UV chromatograms (290 nm). Fractions A-H were further separated by a Hanbon Newstyle NP7000 semi preparative HPLC (Hanbon Sci. & Tech. CO. Jiangsu, China) using a Gemini C18 column (150 x 21.2 mm, 5µm, 25 °C, Phenomenex Inc.; Torrance, CA, USA), 0.3% acetic acid in water as eluent A and methanol as eluent B with a flow rate of 10 ml/min. Compounds **1** (4.0 mg, 98.0% UHPLC-DAD), **2** (6.1 mg, 99.0% UHPLC-DAD), **4** (2.8 mg, 99.90% UHPLC-DAD) **5** (2.1 mg, 90.8% UHPLC-DAD) and **6** (2.2 mg, 98.0% UHPLC-DAD) were isolated from fractions A, C, D and E, respectively, by the following gradient: from 90:10 to 70:30 v/v in 30 min. Fraction D was also separated to afford compound **7** (2.3 mg, 98.7% UHPLC-DAD) with the following gradient: from 85:15 to 70:30 v/v in 10 min, to 40:60 v/v in 10 min. Compound **10** (1.5 mg, 98.0% UHPLC-DAD) was isolated from fraction H with the following gradient: from 45:55 to 35:65 v/v in 30 min. All chromatograms were acquired at the UV absorption maxima of each compound.

The isolated compounds were identified by UHPLC-high resolution Orbitrap<sup>®</sup> mass spectrometry (HR-MS) and by NMR spectroscopy. The UHPLC-MS data for the compounds **1-10** were compared to previously reported values [1]. In the DMSO test solution diluted with aqueous buffer, seven phenylpropanoids (compounds **2, 3, 4, 7, 8, 9, 10**), two lignans (compounds **5, 6**) and one benzoic acid derivate (compound **1**) were detected and characterized by mass spectrometry. Among them *p*-OH-benzaldehyde (**1**), *trans-p*-coumaryl-alcohol (**2**), *p*-coumaryl-aldehyde (**4**), galanganol A (**5**), galanganol B (**6**), *trans-p*-acetoxycinnamyl alcohol (**7**), 1'*S*-1'-acetoxychavicol acetate (**9**) and 1'*S*-1'-

acetoxyeugenol acetate (**10**) were identified by NMR spectroscopy as well. Table S3 shows the main MS data, NMR data is presented below in the Supplementary info.

**Table S1.** UPLC-DAD method validation: linearity, range, LOD and LOQ values

| Compound                                    | Regression equation      | Weight factor | R <sup>2</sup> | Regression range (μM) | LOD (μM) | LOQ (μM) |
|---------------------------------------------|--------------------------|---------------|----------------|-----------------------|----------|----------|
| <i>p</i> -OH-benzaldehyde (1)               | $y = 4842.67x + 141.90$  | $1/x^2$       | 1.0000         | 0.5-500               | 0.14     | 0.45     |
| <i>trans-p</i> -coumaryl-alcohol (2)        | $y = 11571.37x + 55.07$  | $1/x^2$       | 0.9995         | 0.5-500               | 0.05     | 0.15     |
| <i>p</i> -coumaryl-aldehyde (4)             | $y = 11504.91x + 192.25$ | $1/x^2$       | 0.9998         | 0.5-500               | 0.06     | 0.21     |
| galanganol A (5)                            | $y = 4648.73x - 359.17$  | $1/x^2$       | 1.0000         | 0.5-500               | 0.16     | 0.50     |
| galanganol B (6)                            | $y = 2777.05x - 29.88$   | $1/x$         | 0.9997         | 0.5-500               | 0.16     | 0.50     |
| <i>trans-p</i> -acetoxycinnamyl alcohol (7) | $y = 8395.27x + 51.64$   | $1/x^2$       | 0.9997         | 0.5-500               | 0.07     | 0.24     |
| 1'S-1'-acetoxychavicol acetate (9)          | $y = 6072.03x - 76.32$   | $1/x$         | 0.9998         | 0.5-500               | 0.04     | 0.12     |
| 1'S-1'-acetoxyeugenol acetate (10)          | $y = 1344.93x - 253.64$  | $1/x^2$       | 0.9998         | 0.5-500               | 0.04     | 0.14     |

**Table S2.** UPLC-DAD system suitability tests: Precision and accuracy

| Nominal conc. (μM)                                | Precision (RSD%) |          | Accuracy (%) |          |
|---------------------------------------------------|------------------|----------|--------------|----------|
|                                                   | Intraday         | Interday | Intraday     | Interday |
| <b><i>p</i>-OH-benzaldehyde (1)</b>               |                  |          |              |          |
| 500                                               | 0.30             | 0.45     | 98.70        | 99.64    |
| 10                                                | 0.42             | 1.10     | 99.72        | 100.10   |
| 0.5                                               | 2.43             | 2.92     | 97.12        | 100.00   |
| <b><i>trans-p</i>-coumaryl-alcohol (2)</b>        |                  |          |              |          |
| 500                                               | 1.12             | 1.02     | 91.92        | 93.66    |
| 10                                                | 1.68             | 1.54     | 101.23       | 103.38   |
| 0.5                                               | 0.72             | 1.31     | 99.08        | 99.83    |
| <b><i>p</i>-coumaryl-aldehyde (4)</b>             |                  |          |              |          |
| 500                                               | 0.53             | 0.83     | 95.47        | 96.18    |
| 10                                                | 1.22             | 1.25     | 100.10       | 101.96   |
| 0.5                                               | 0.14             | 0.75     | 100.67       | 99.90    |
| <b>galanganol A (5)</b>                           |                  |          |              |          |
| 500                                               | 0.48             | 0.81     | 100.69       | 101.17   |
| 10                                                | 0.33             | 0.77     | 97.39        | 97.79    |
| 0.5                                               | 1.16             | 4.49     | 99.90        | 100.13   |
| <b>galanganol B (6)</b>                           |                  |          |              |          |
| 500                                               | 0.08             | 0.59     | 100.86       | 101.11   |
| 10                                                | 0.36             | 1.97     | 99.81        | 98.42    |
| 0.5                                               | 1.19             | 1.25     | 108.24       | 107.84   |
| <b><i>trans-p</i>-acetoxycinnamyl alcohol (7)</b> |                  |          |              |          |
| 500                                               | 1.90             | 1.67     | 96.54        | 97.02    |
| 10                                                | 3.37             | 2.97     | 101.59       | 102.17   |
| 0.5                                               | 1.05             | 2.07     | 102.71       | 102.39   |
| <b>1'S-1'-acetoxychavicol acetate (9)</b>         |                  |          |              |          |
| 500                                               | 1.69             | 1.49     | 97.52        | 98.20    |
| 10                                                | 1.02             | 1.23     | 99.57        | 102.10   |
| 0.5                                               | 2.28             | 3.40     | 87.71        | 90.29    |
| <b>1'S-1'-acetoxyeugenol acetate (10)</b>         |                  |          |              |          |
| 500                                               | 3.20             | 2.83     | 107.39       | 104.23   |
| 10                                                | 1.24             | 2.30     | 94.74        | 90.80    |
| 0.5                                               | 4.68             | 4.09     | 81.47        | 82.42    |

**Table S3.** The main UHPLC-Orbitrap® MS data of isolated compounds.

| Compound                                        | t <sub>R</sub><br>(min) | m/z<br>[M+H] <sup>+</sup>  | Error<br>(ppm) | Fragment<br>ions      | Molecular<br>formula                           | Identification |
|-------------------------------------------------|-------------------------|----------------------------|----------------|-----------------------|------------------------------------------------|----------------|
| <i>p</i> -OH-benzaldehyde (1)                   | 3.92                    | 123.0277                   | -0.726         | -                     | C <sub>7</sub> H <sub>6</sub> O <sub>2</sub>   | NMR            |
| <i>trans-p</i> -coumaryl-alcohol (2)            | 4.19                    | 151.0750                   | -0.036         | 133.0650              | C <sub>9</sub> H <sub>10</sub> O <sub>2</sub>  | NMR            |
| isomer of <i>p</i> -coumaryl-alcohol (3)        | 4.23                    | 151.0750                   | 0.204          | 133.0650              | C <sub>9</sub> H <sub>10</sub> O <sub>2</sub>  | MS             |
| <i>p</i> -coumaryl-aldehyde (4)                 | 4.94                    | 149.0595                   | 0.204          | -                     | C <sub>9</sub> H <sub>8</sub> O <sub>2</sub>   | NMR            |
| galanganol A (5)                                | 5.26                    | 301.1434                   | -0.066         | -                     | C <sub>18</sub> H <sub>20</sub> O <sub>4</sub> | NMR            |
| galanganol B (6)                                | 5.61                    | 301.1434                   | -0.036         | -                     | C <sub>18</sub> H <sub>20</sub> O <sub>4</sub> | NMR            |
| <i>trans-p</i> -acetoxycinnamyl alcohol (7)     | 5.77                    | 193.0855                   | -0.391         | 133.0650,<br>175.0755 | C <sub>11</sub> H <sub>12</sub> O <sub>3</sub> | NMR            |
| isomer of <i>p</i> -acetoxycinnamyl alcohol (8) | 5.83                    | 193.0855                   | -0.391         | 133.0650,<br>175.0755 | C <sub>11</sub> H <sub>12</sub> O <sub>3</sub> | MS             |
| Compound                                        | t <sub>R</sub><br>(min) | m/z<br>[M+Na] <sup>+</sup> | Error<br>(ppm) | Fragment<br>ions      | Molecular<br>formula                           | Identification |
| 1' <i>S</i> -1'-acetoxychavicol acetate (9)     | 7.17                    | 257.0784                   | -0.030         | 133.0650,<br>175.0755 | C <sub>13</sub> H <sub>14</sub> O <sub>4</sub> | NMR            |
| 1' <i>S</i> -1'-acetoxyeugenol acetate (10)     | 7.17                    | 287.0889                   | -0.065         | 163.0759,<br>205.0865 | C <sub>14</sub> H <sub>16</sub> O <sub>5</sub> | NMR            |

$^1\text{H}$  NMR data of *p*-OH-benzaldehyde (**1**)

$^1\text{H}$  NMR (methanol- $d_4$ , 600 MHz, 295 K):  $\delta$  9.76 (s, 1H, H-1), 7.77 (d,  $^3J_{\text{H,H}}=8.6$  Hz, 2H, H-2', H-6'), 6.91 (d,  $^3J_{\text{H,H}}=8.6$  Hz, 2H, H-3', H-5').

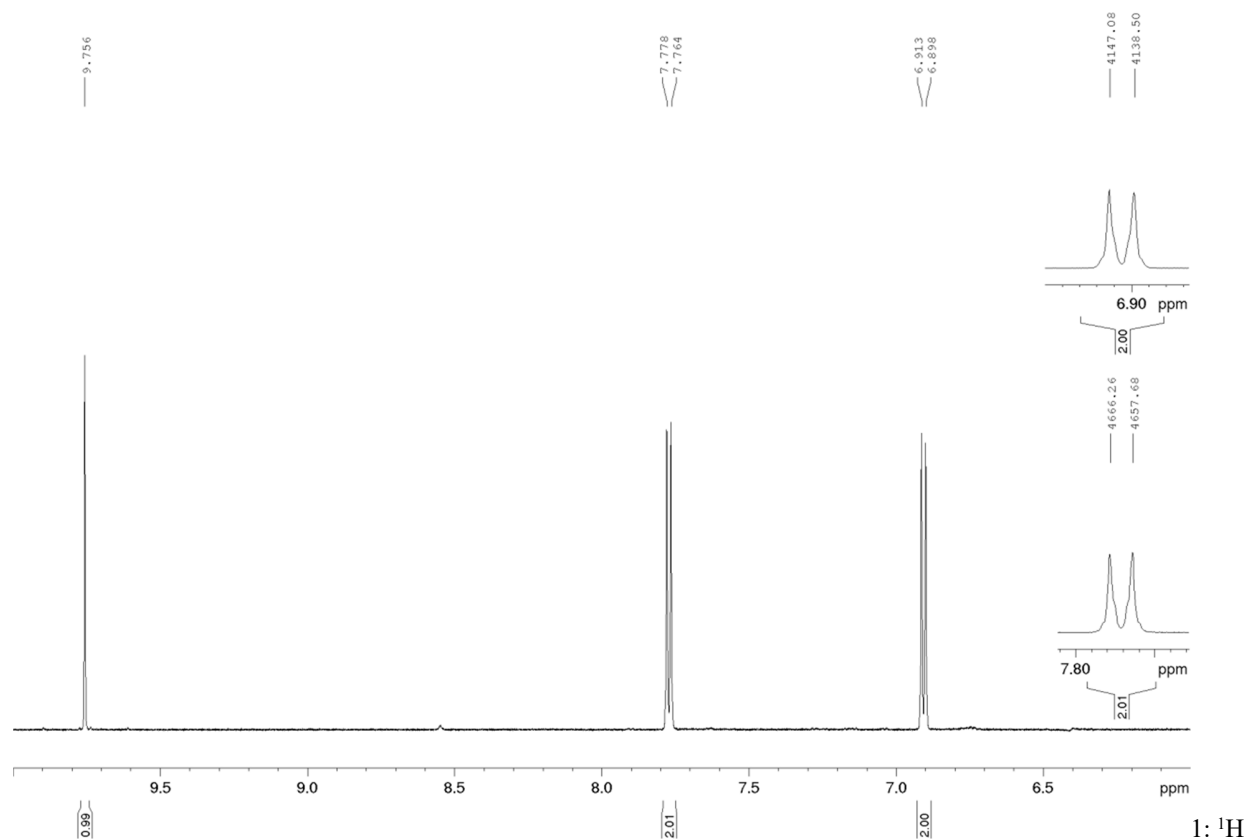

**Figure S1.** NMR spectrum and selected spectral regions of *p*-OH-benzaldehyde (**1**) (methanol- $d_4$ )

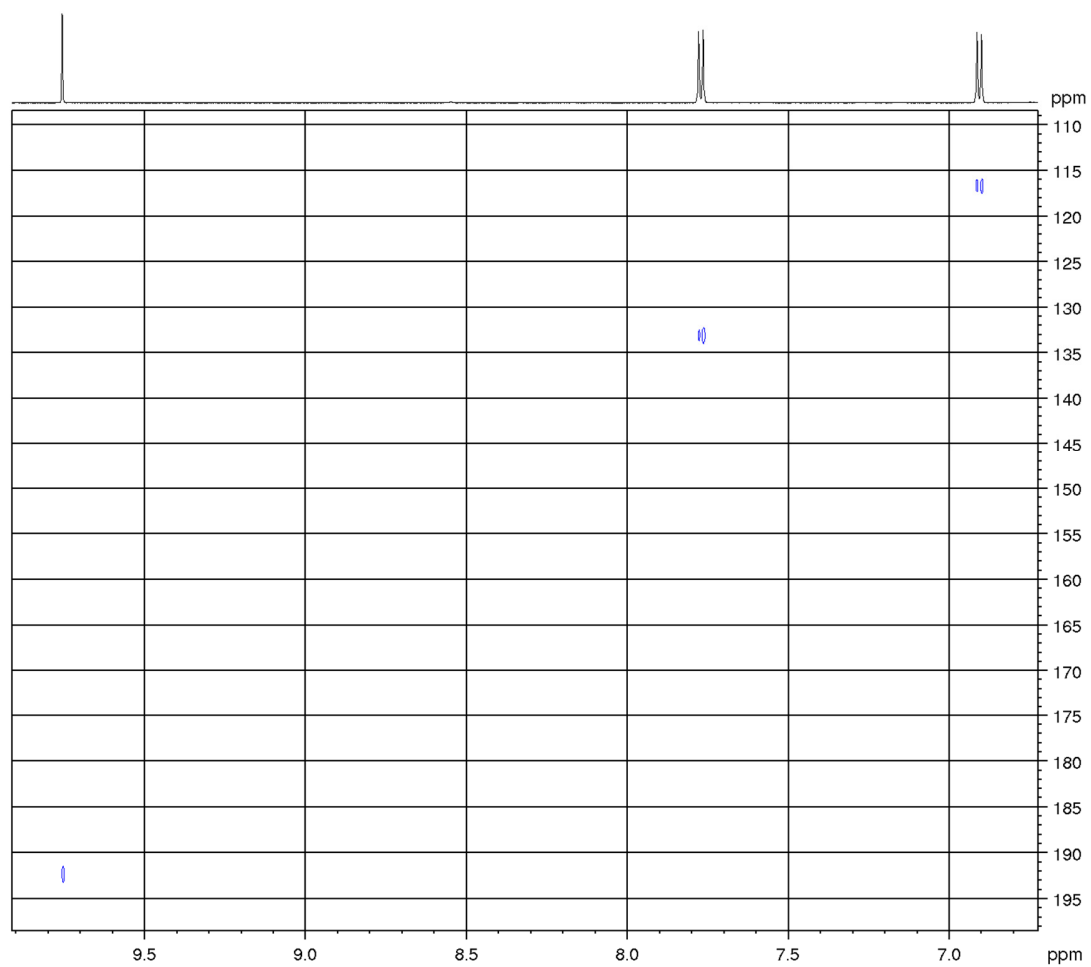

**Figure S2.** HSQC spectrum of *p*-OH-benzaldehyde (**1**) (methanol-*d*<sub>4</sub>)

$^1\text{H}$  and  $^{13}\text{C}$  NMR data of *trans-p*-coumaryl-alcohol (2)

$^1\text{H}$  NMR (methanol- $d_4$ , 600 MHz, 295 K):  $\delta$  7.24 (d,  $^3J_{\text{H,H}}=8.5$  Hz, 2H, H-2', H-6'), 6.72 (d,  $^3J_{\text{H,H}}=8.5$  Hz, 2H, H-3', H-5'), 6.50 (d,  $^3J_{\text{H,H}}=15.9$  Hz, 1H, H-1), 6.16 (dt,  $^3J_{\text{H,H}}=15.9$  Hz,  $^3J_{\text{H,H}}=6.0$  Hz, 1H, H-2), 4.18 (d,  $^3J_{\text{H,H}}=6.0$  Hz, 1H, H-3).  $^{13}\text{C}$  NMR (methanol- $d_4$ , 150 MHz, 295 K):  $\delta$  158.3 (C-4'), 131.9 (C-1), 130.0 (C-1'), 128.7 (C-2', C-6'), 126.6 (C-2), 116.3 (C-3', C-5'), 64.0 (C-3).

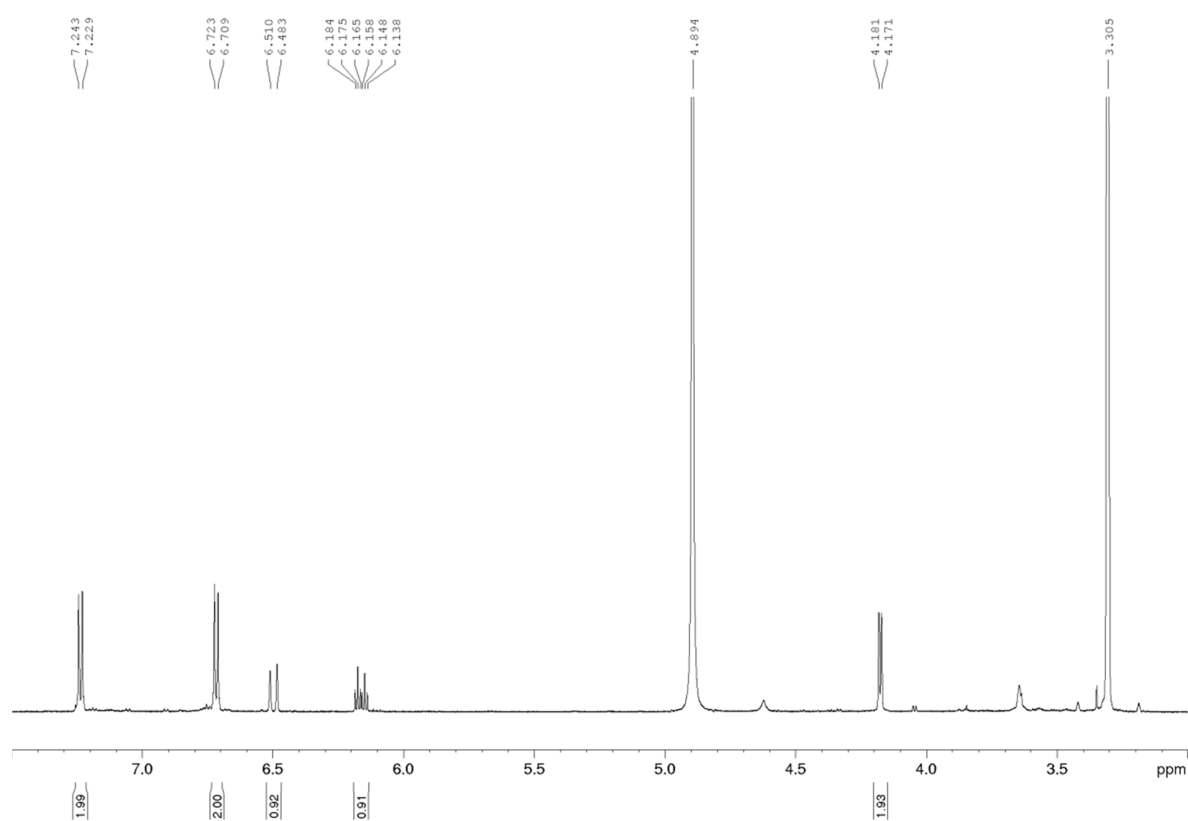

**Figure S3.**  $^1\text{H}$  NMR spectrum of *trans-p*-coumaryl-alcohol (2) (methanol- $d_4$ )



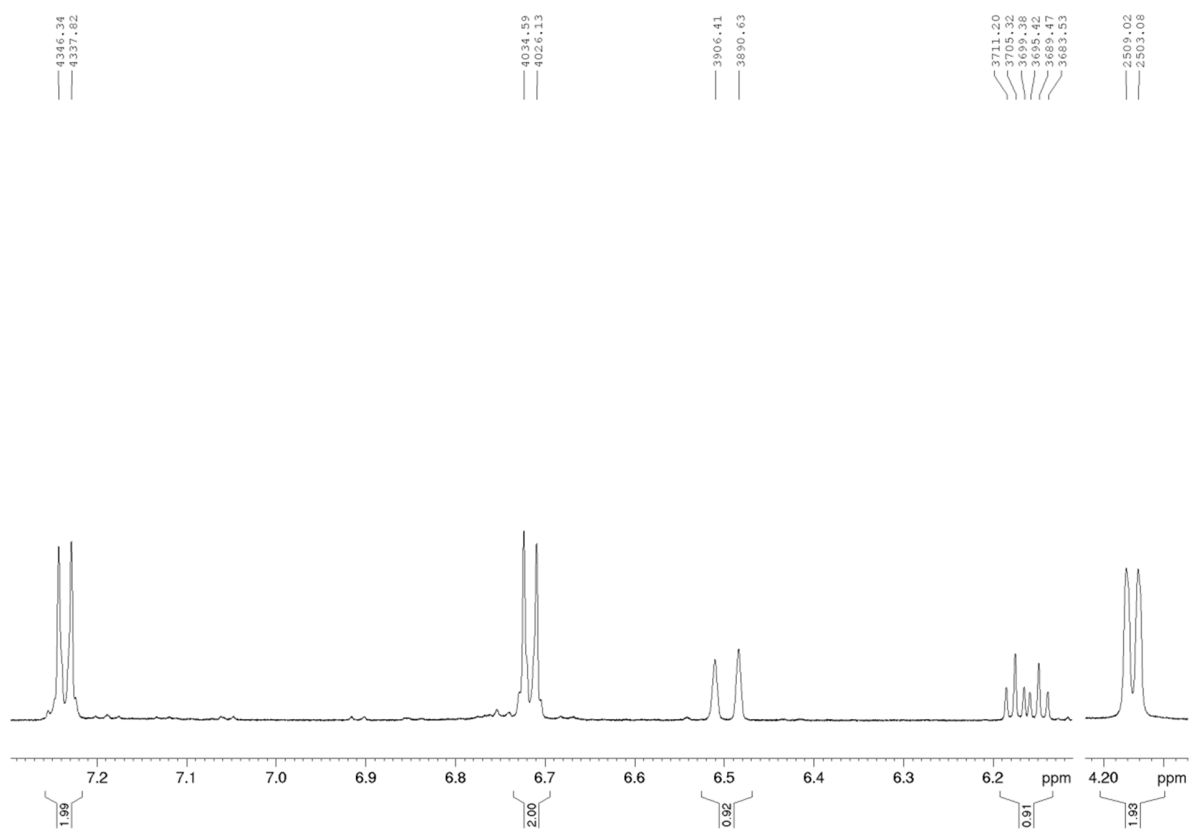

**Figure S4.** Selected  $^1\text{H}$  NMR spectral regions of *trans-p*-coumaryl-alcohol (2) ( $\text{methanol-}d_4$ )

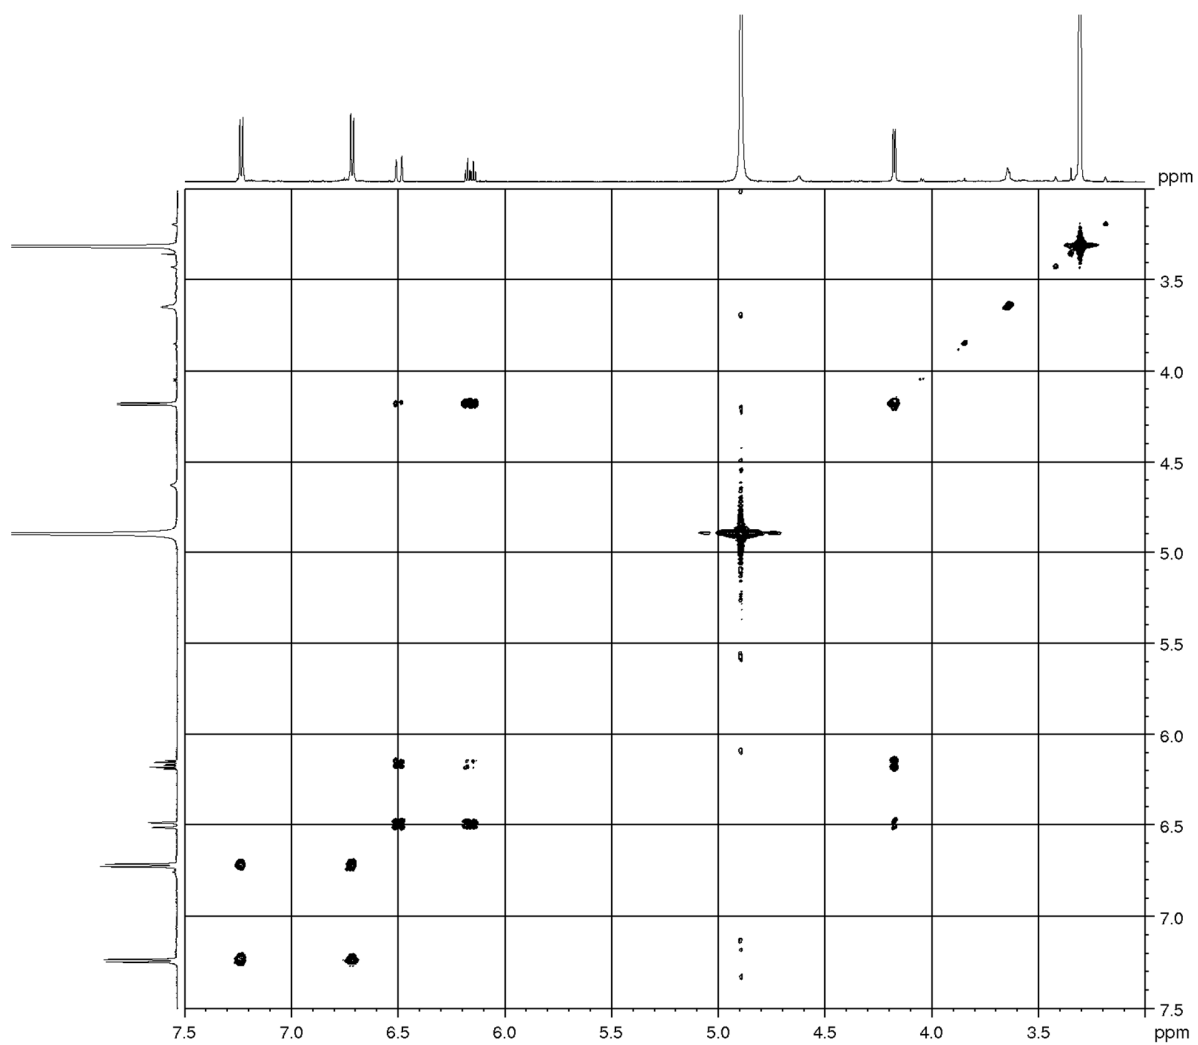

**Figure S5.** COSY spectrum of *trans-p*-coumaryl-alcohol (2) (methanol-*d*<sub>4</sub>)

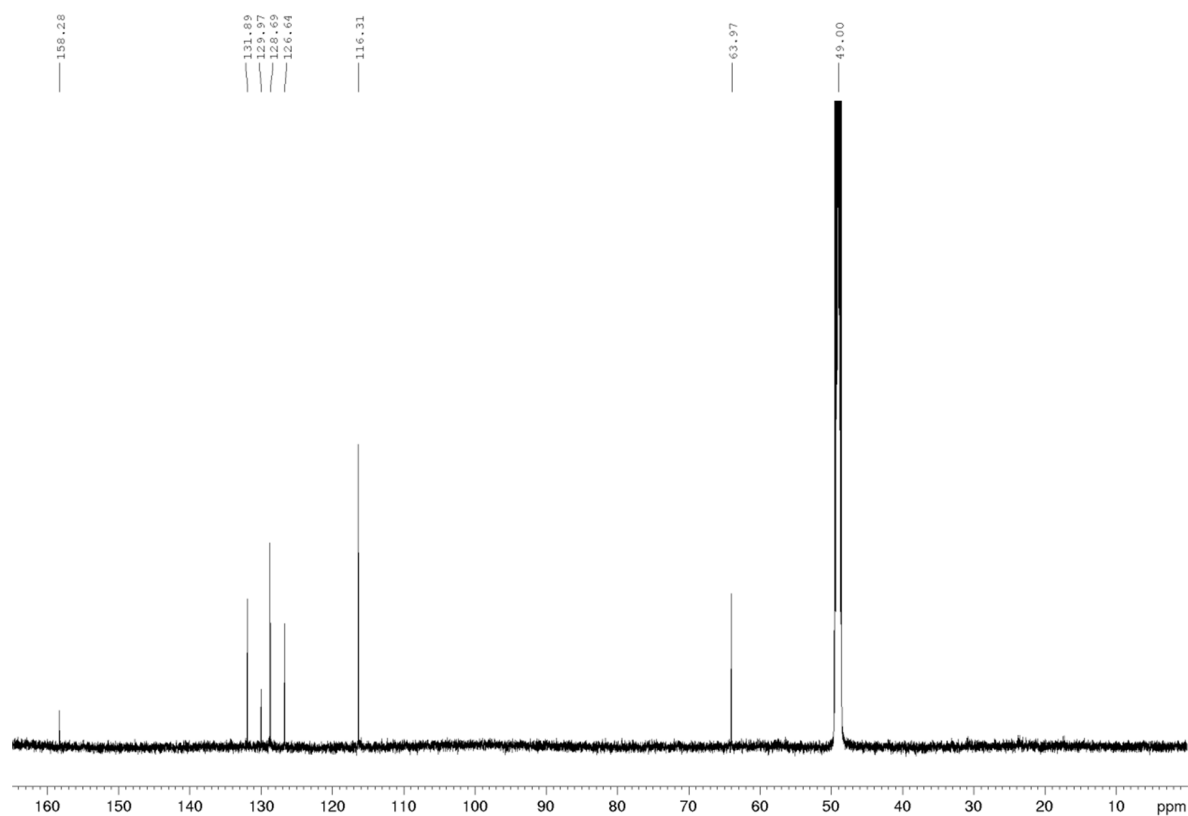

Figure S6.  $^{13}\text{C}$  spectrum of *trans-p*-coumaryl-alcohol (2) (methanol- $d_4$ )

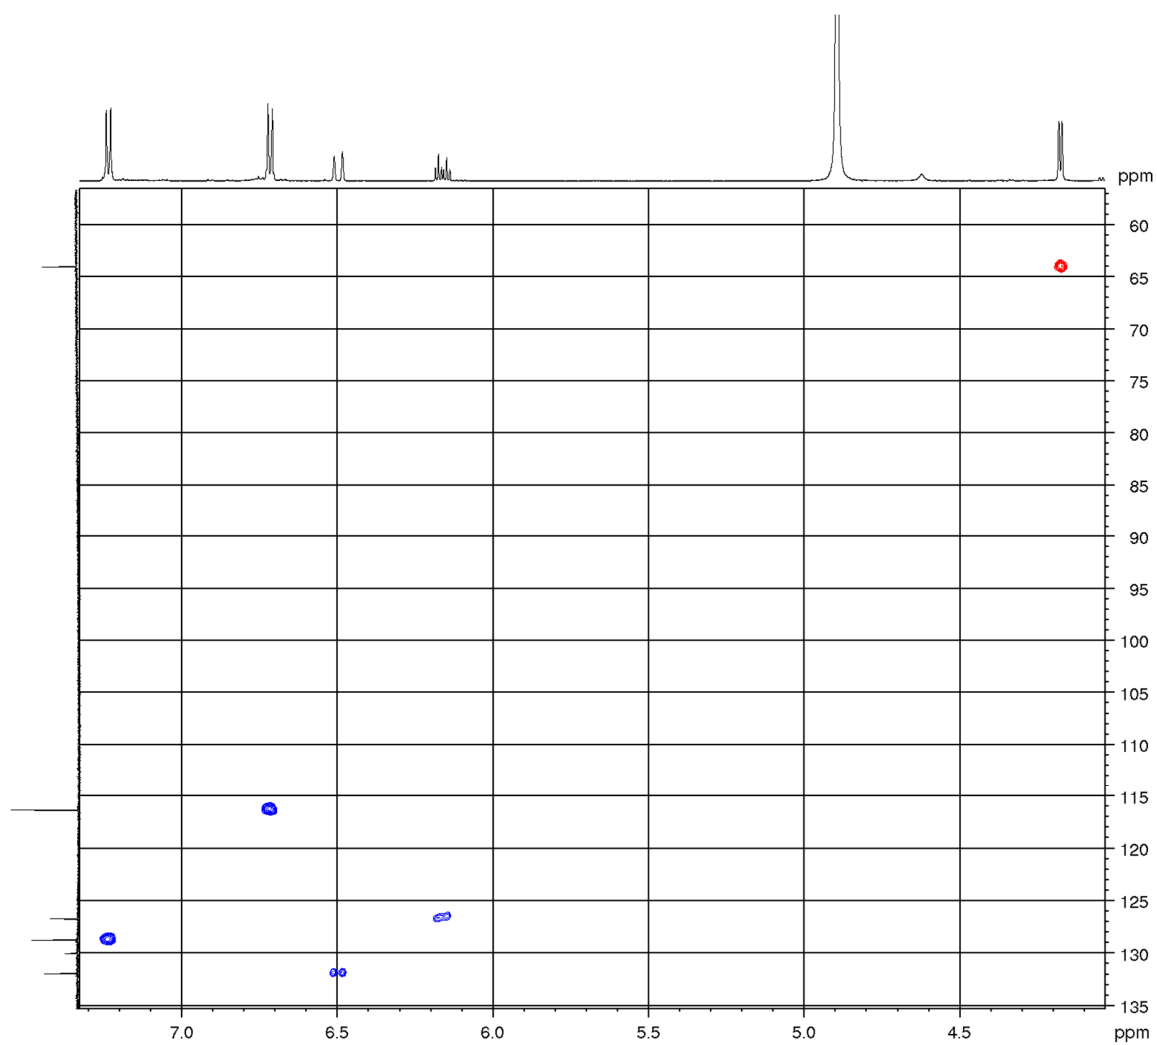

**Figure S7.** HSQC spectrum of *trans-p*-coumaryl-alcohol (**2**) (methanol- $d_4$ )

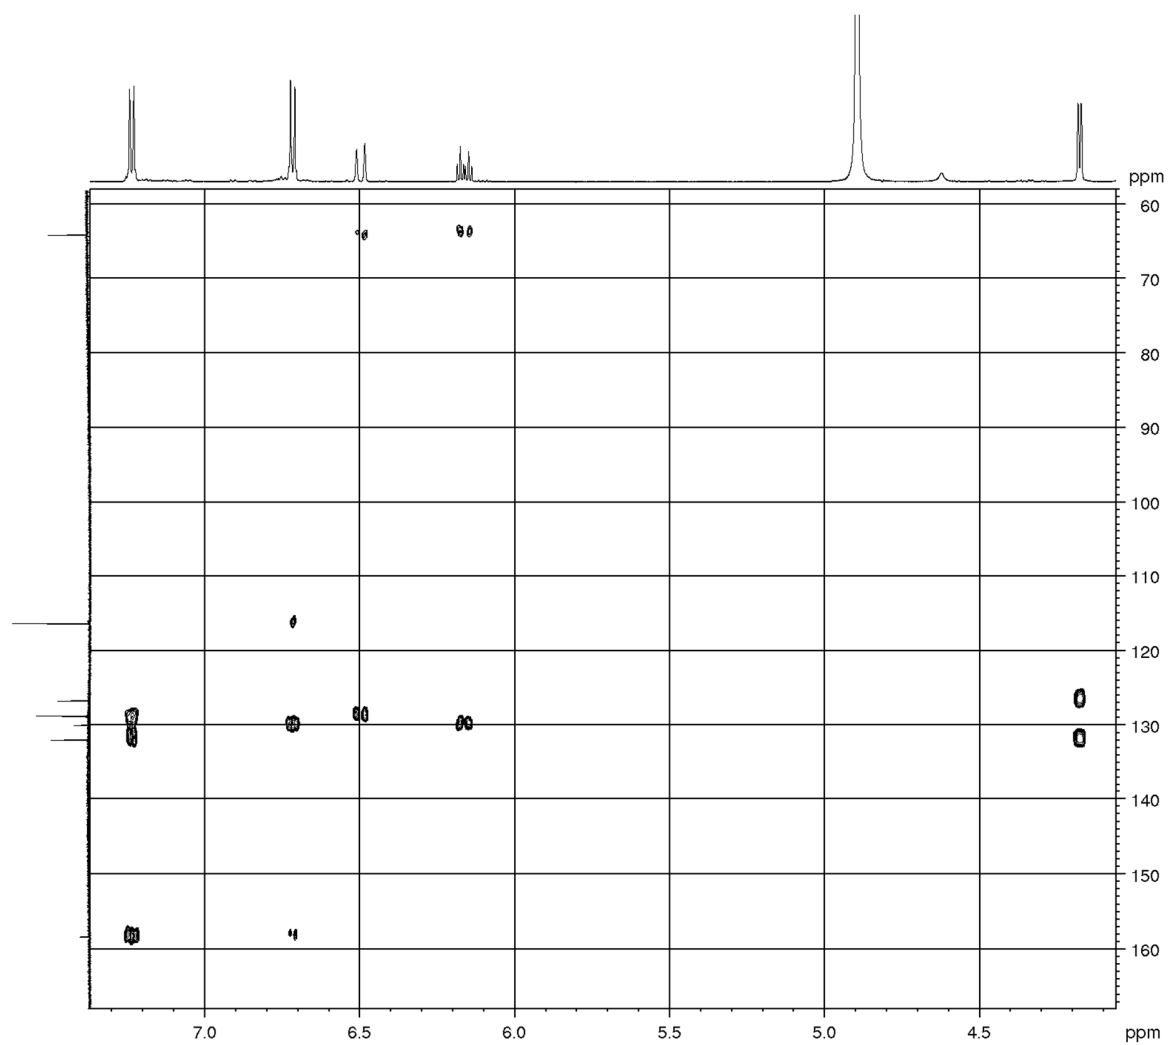

**Figure S8.** HMBC spectrum of *trans-p*-coumaryl-alcohol (2) (methanol-*d*<sub>4</sub>)

$^1\text{H}$  and  $^{13}\text{C}$  NMR data of *p*-coumaryl-aldehyde (**4**)

$^1\text{H}$  NMR (methanol- $d_4$ , 600 MHz, 295 K):  $\delta$  9.56 (d,  $^3J_{\text{H,H}}=7.9$  Hz, 1H, H-3), 7.59 (d,  $^3J_{\text{H,H}}=15.7$  Hz, 1H, H-1), 7.55 (d,  $^3J_{\text{H,H}}=8.6$  Hz, 2H, H-2', H-6'), 6.84 (d,  $^3J_{\text{H,H}}=8.6$  Hz, 2H, H-3', H-5'), 6.61 (dt,  $^3J_{\text{H,H}}=15.7$  Hz,  $^3J_{\text{H,H}}=7.9$  Hz, 1H, H-2).  $^{13}\text{C}$  NMR (methanol- $d_4$ , 150 MHz, 295 K):  $\delta$  196.2 (C-3), 162.4 (C-4'), 156.1 (C-1), 132.0 (C-2', C-6'), 127.0 (C-1'), 126.4 (C-2), 117.0 (C-3', C-5').

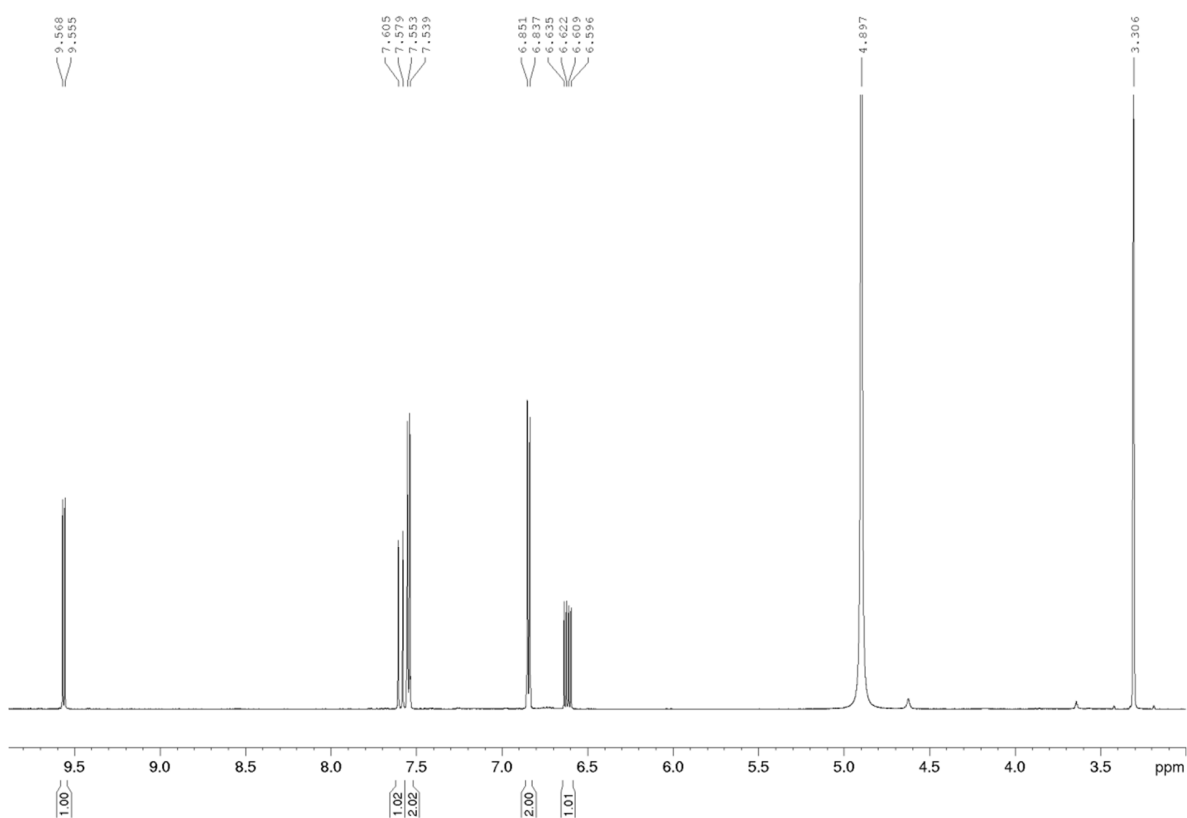

**Figure S9.**  $^1\text{H}$  NMR spectrum of *p*-coumaryl-aldehyde (**4**) (methanol- $d_4$ )

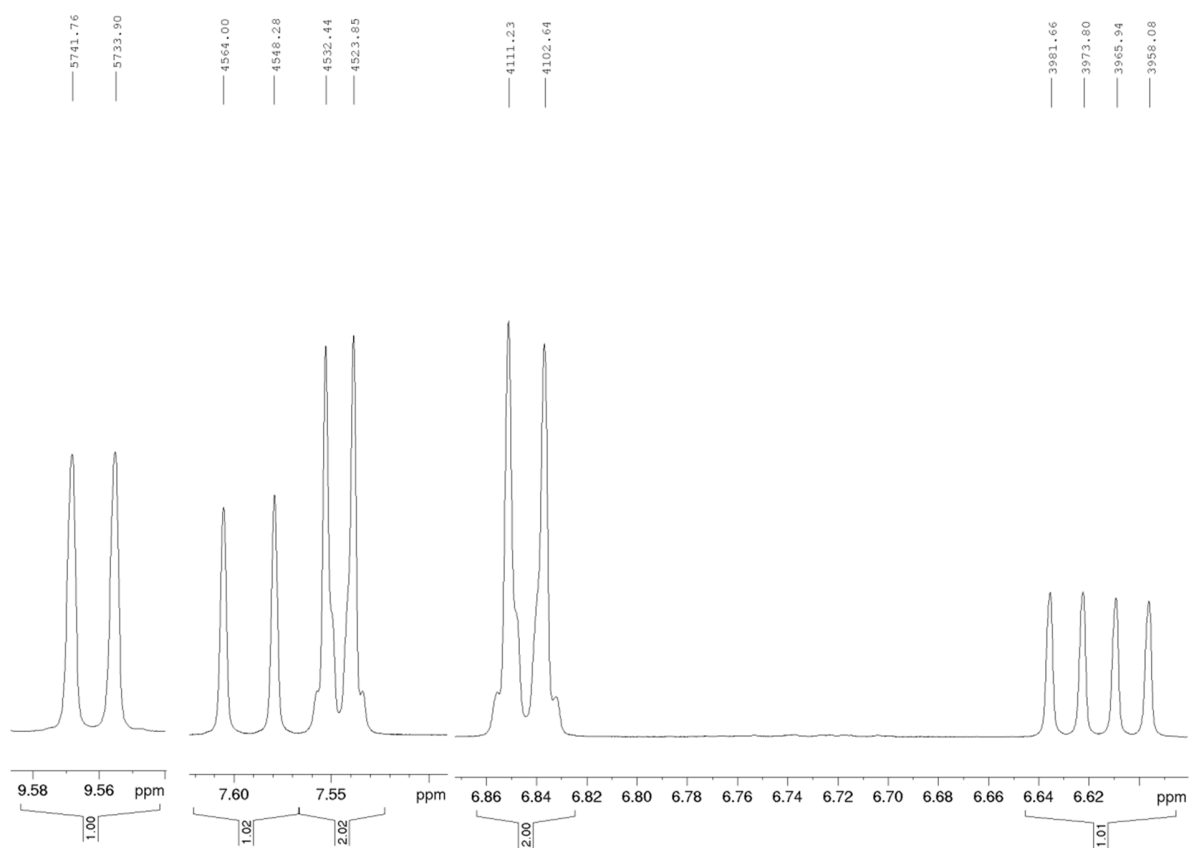

**Figure S10.** Selected  $^1\text{H}$  NMR spectral regions of *p*-coumaryl-aldehyde (4) (methanol- $d_4$ )

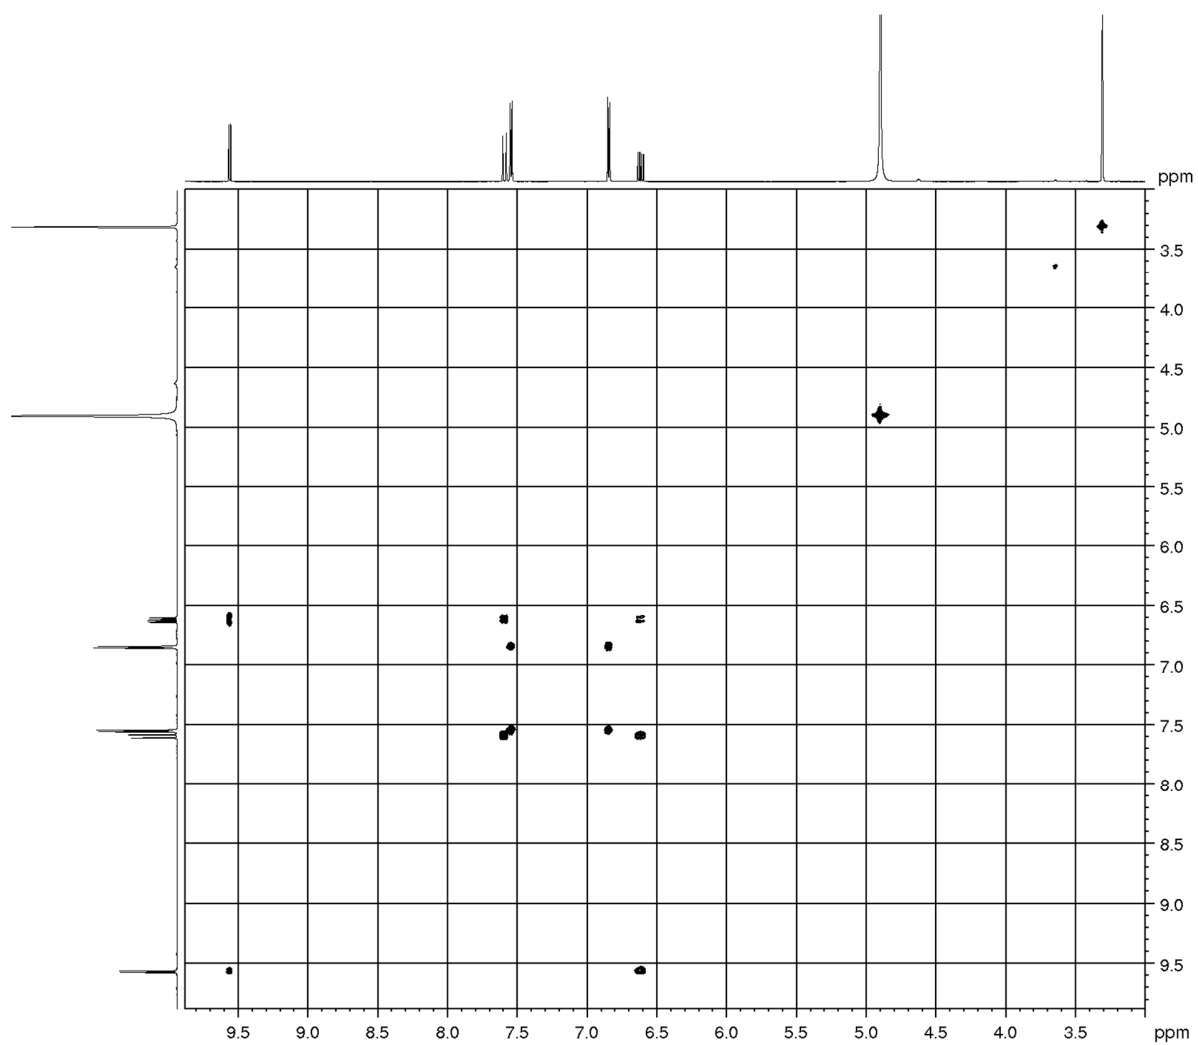

**Figure S11.** COSY spectrum of *p*-coumaryl-aldehyde (4) (methanol-*d*<sub>4</sub>)



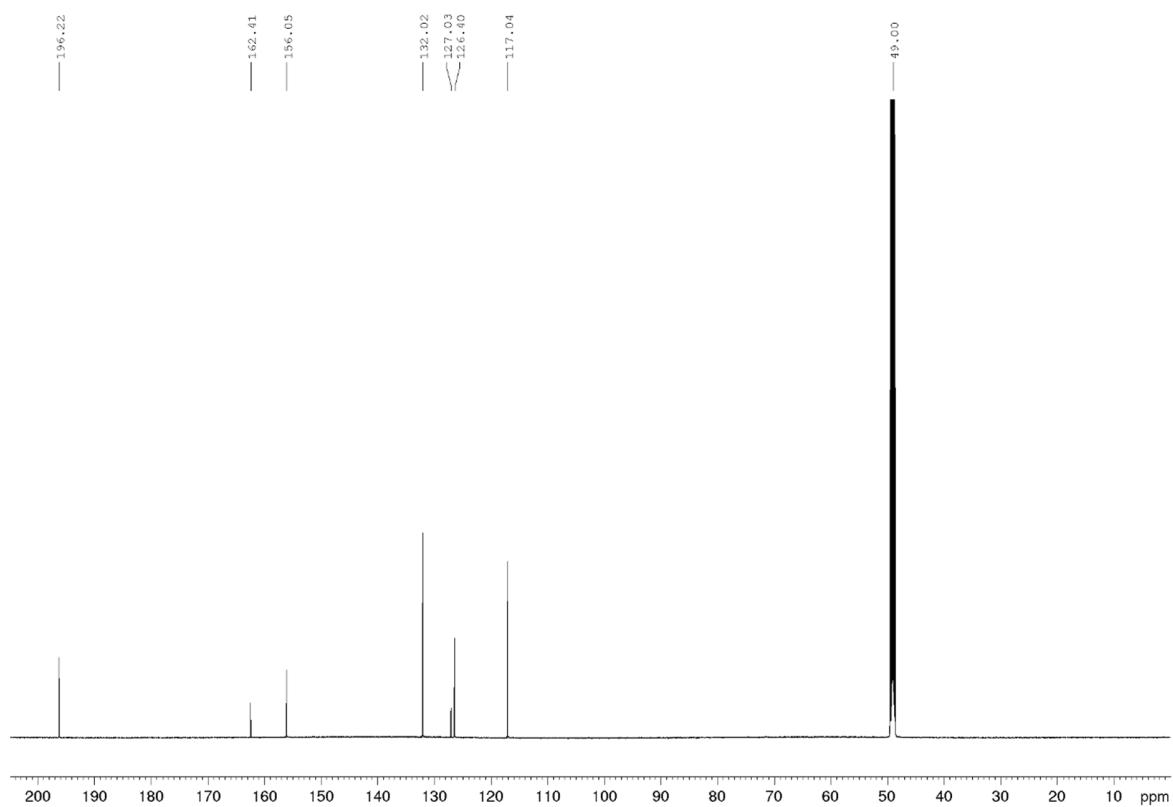

**Figure S12.**  $^{13}\text{C}$  NMR spectrum of *p*-coumaryl-aldehyde (4) (methanol- $d_4$ )

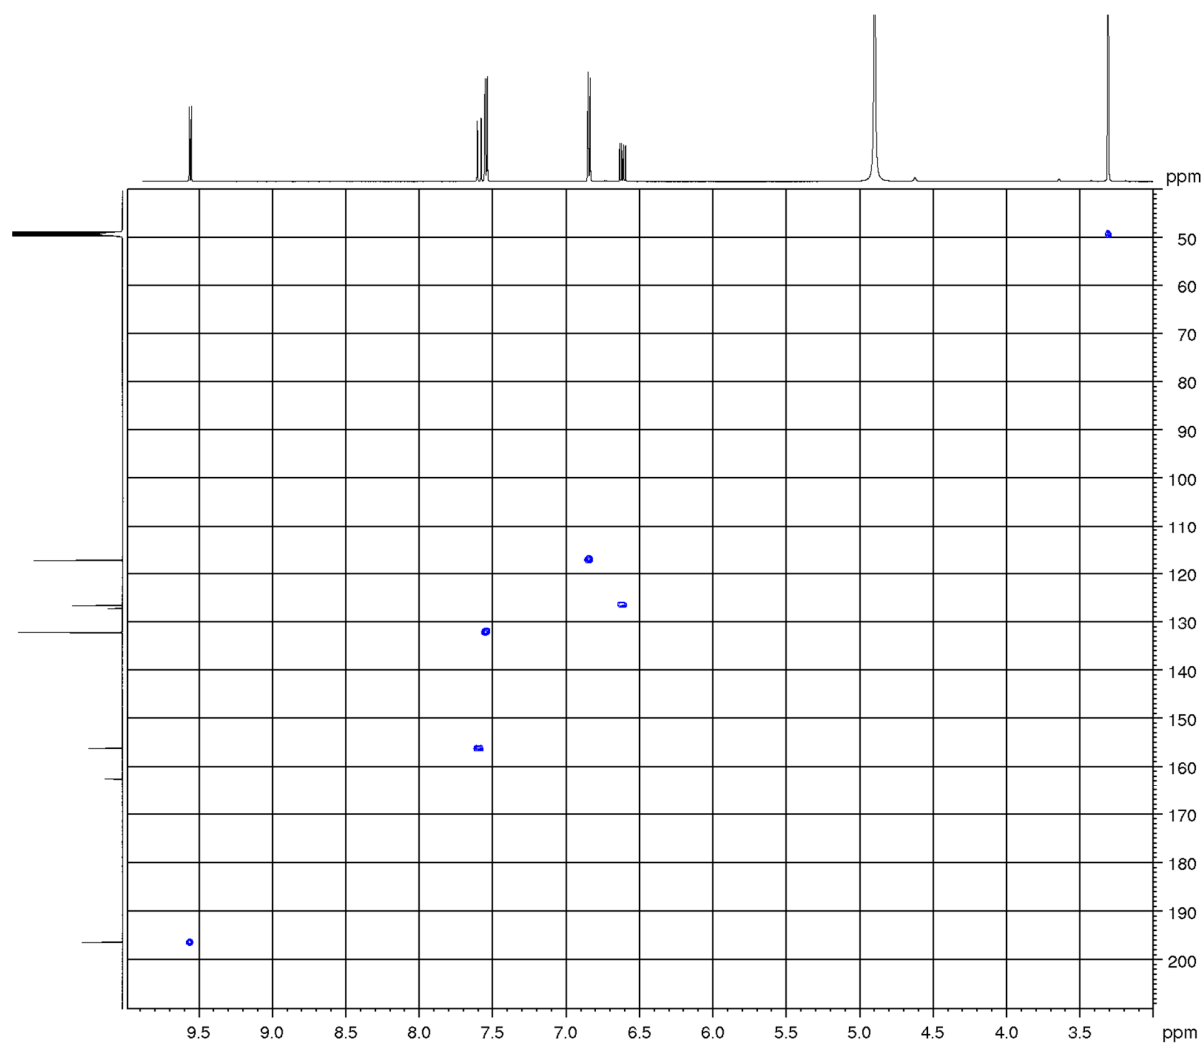

**Figure S13.** HSQC spectrum of *p*-coumaryl-aldehyde (4) (methanol-*d*<sub>4</sub>)

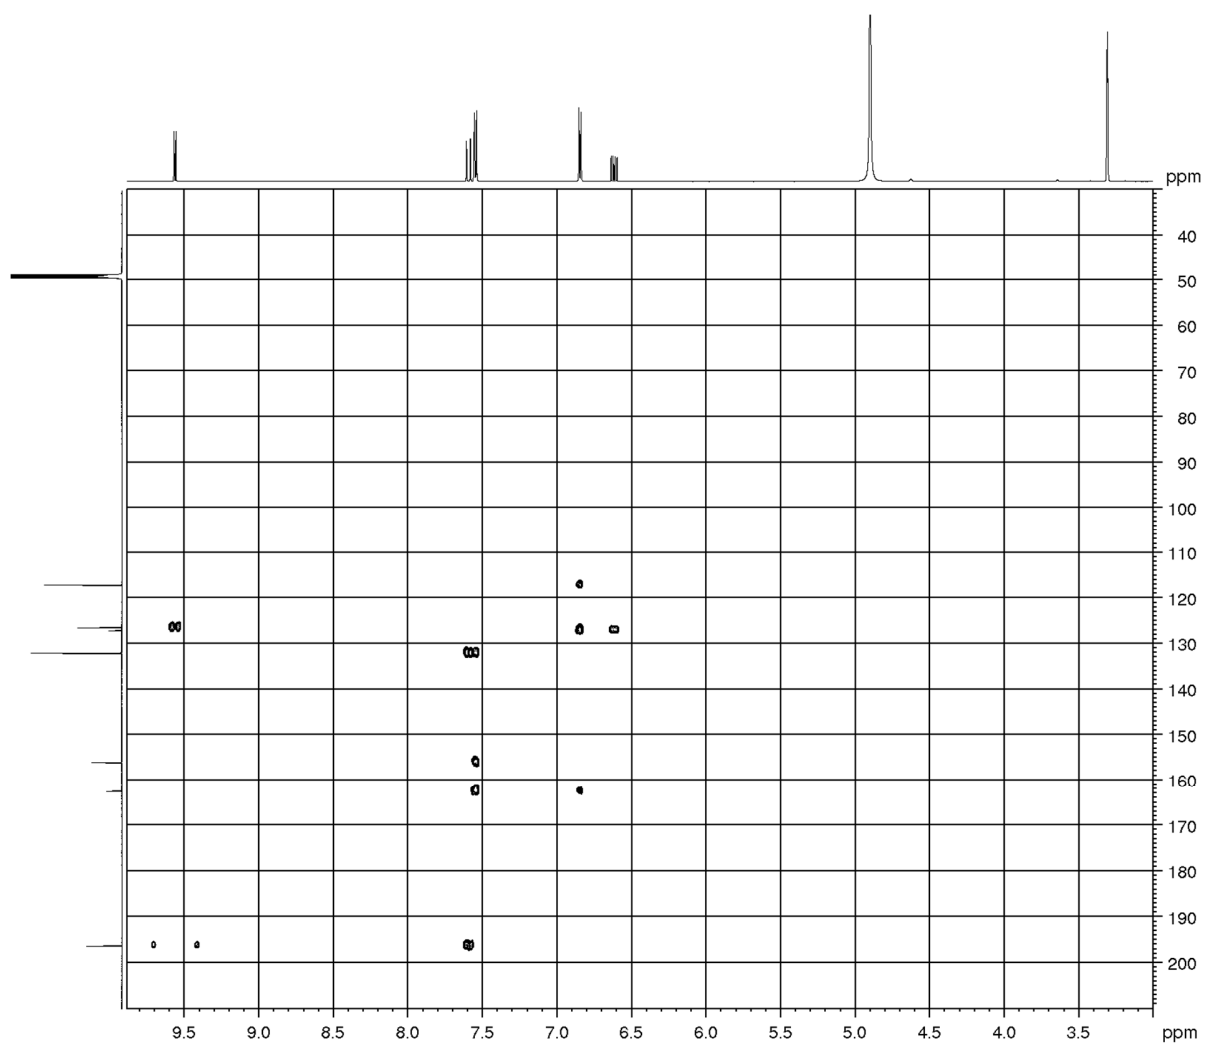

**Figure S14.** HMBC spectrum of *p*-coumaryl-aldehyde (**4**) (methanol-*d*<sub>4</sub>)

$^1\text{H}$  and  $^{13}\text{C}$  NMR data of galanganol A (**5**)

$^1\text{H}$  NMR (methanol- $d_4$ , 600 MHz, 295 K):  $\delta$  7.18 (d,  $^3J_{\text{H,H}}=8.5$  Hz, 2H, H-2', H-6'), 7.15 (d,  $^3J_{\text{H,H}}=8.5$  Hz, 2H, H-2'', H-6''), 6.76 (d,  $^3J_{\text{H,H}}=8.5$  Hz, 2H, H-3', H-5'), 6.68 (d,  $^3J_{\text{H,H}}=8.5$  Hz, 2H, H-3'', H-5''), 6.29 (d,  $^3J_{\text{H,H}}=15.6$  Hz, 1H, H-5), 6.01 (m, 1H, H-4), 4.74 (d,  $^3J_{\text{H,H}}=6.1$  Hz, 1H, H-1), 3.57 (m, 1H, H-6a), 3.40 (m, 1H, H-6b), 2.35 (m, 1H, H-3a), 2.24 (m, 1H, H-3b), 1.90 (m, 1H, H-2).  $^{13}\text{C}$  NMR (methanol- $d_4$ , 150 MHz, 295 K):  $\delta$  157.6 (C-4'), 157.6 (C-4''), 135.9 (C-1'), 132.4 (C-5), 131.0 (C-1''), 128.6 (C-2', C-6'), 128.1 (C-2'', C-6''), 126.8 (C-4), 116.2 (C-3'', C-5''), 115.8 (C-3', C-5'), 74.5 (C-1), 62.6 (C-6), 49.6 (C-2), 30.5 (C-3).

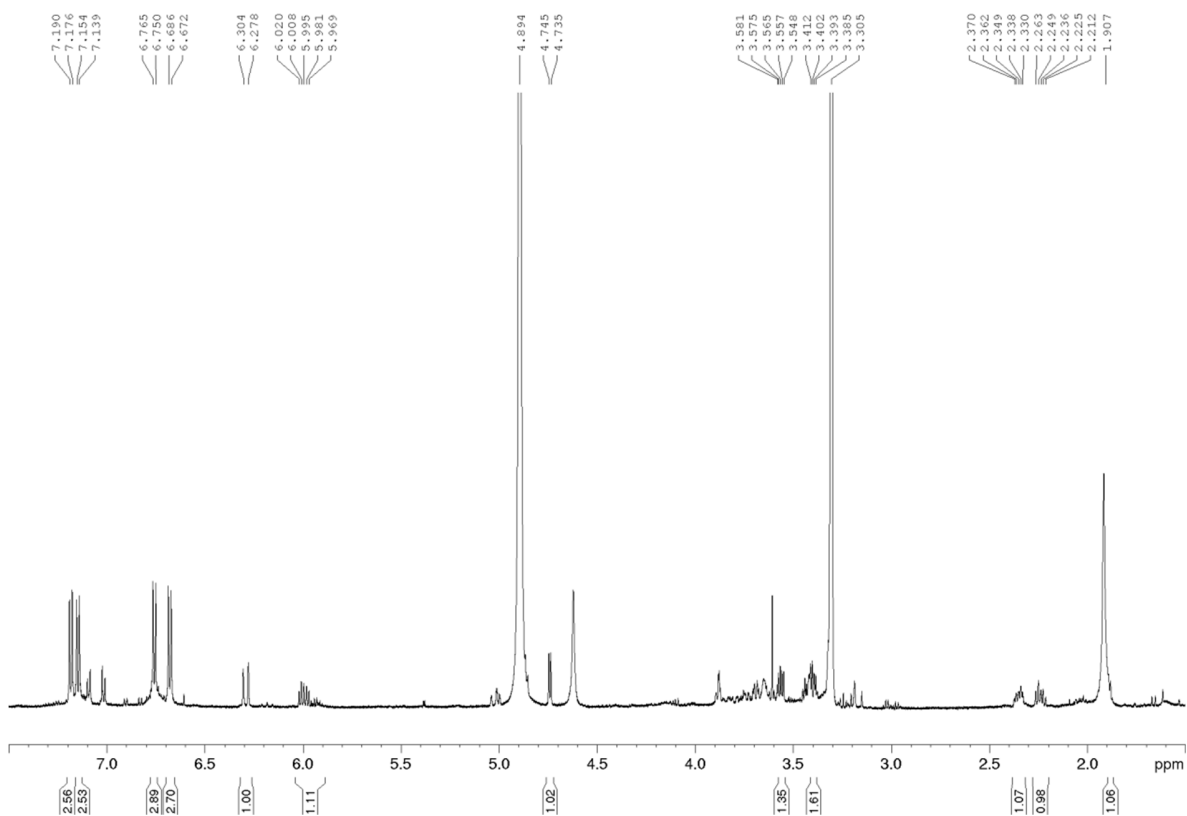

**Figure S15.**  $^1\text{H}$  NMR spectrum of galanganol A (**5**) (methanol- $d_4$ )

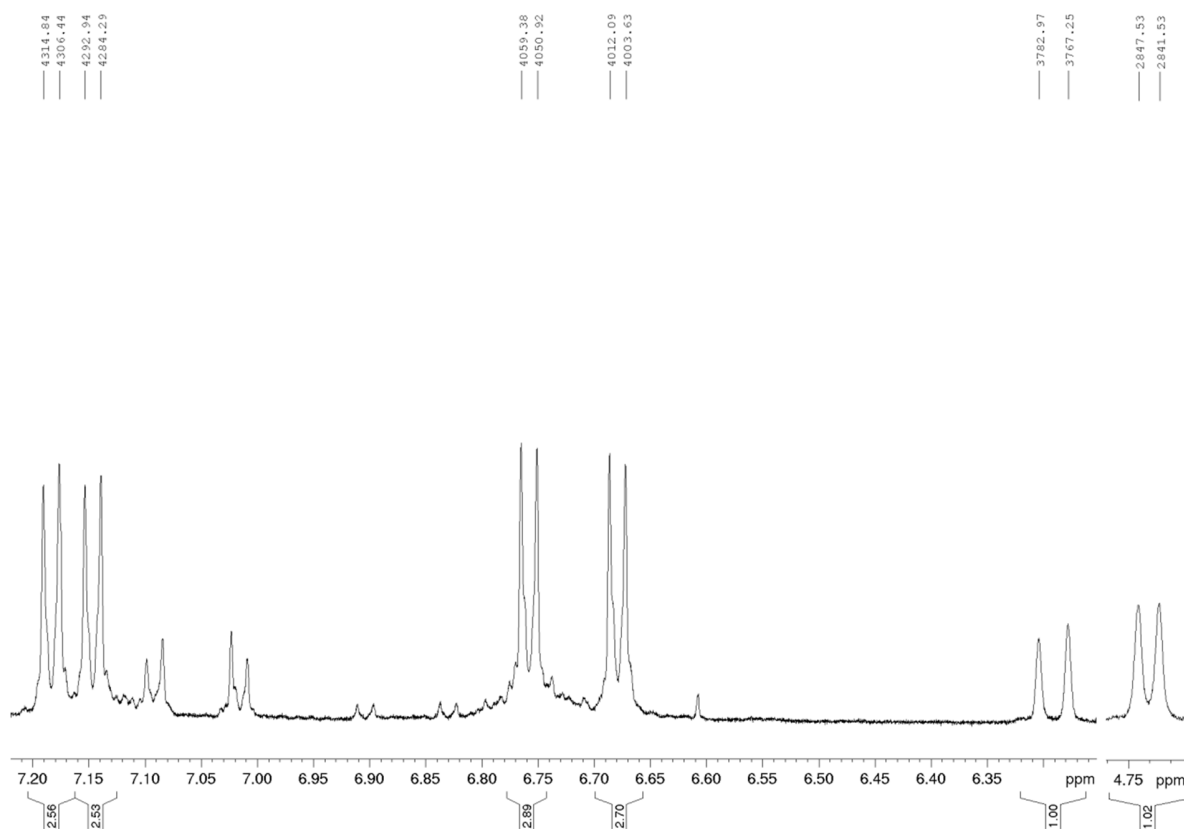

**Figure S16.** Selected  $^1\text{H}$  NMR spectral regions of galanganol A (**5**) (methanol- $d_4$ )

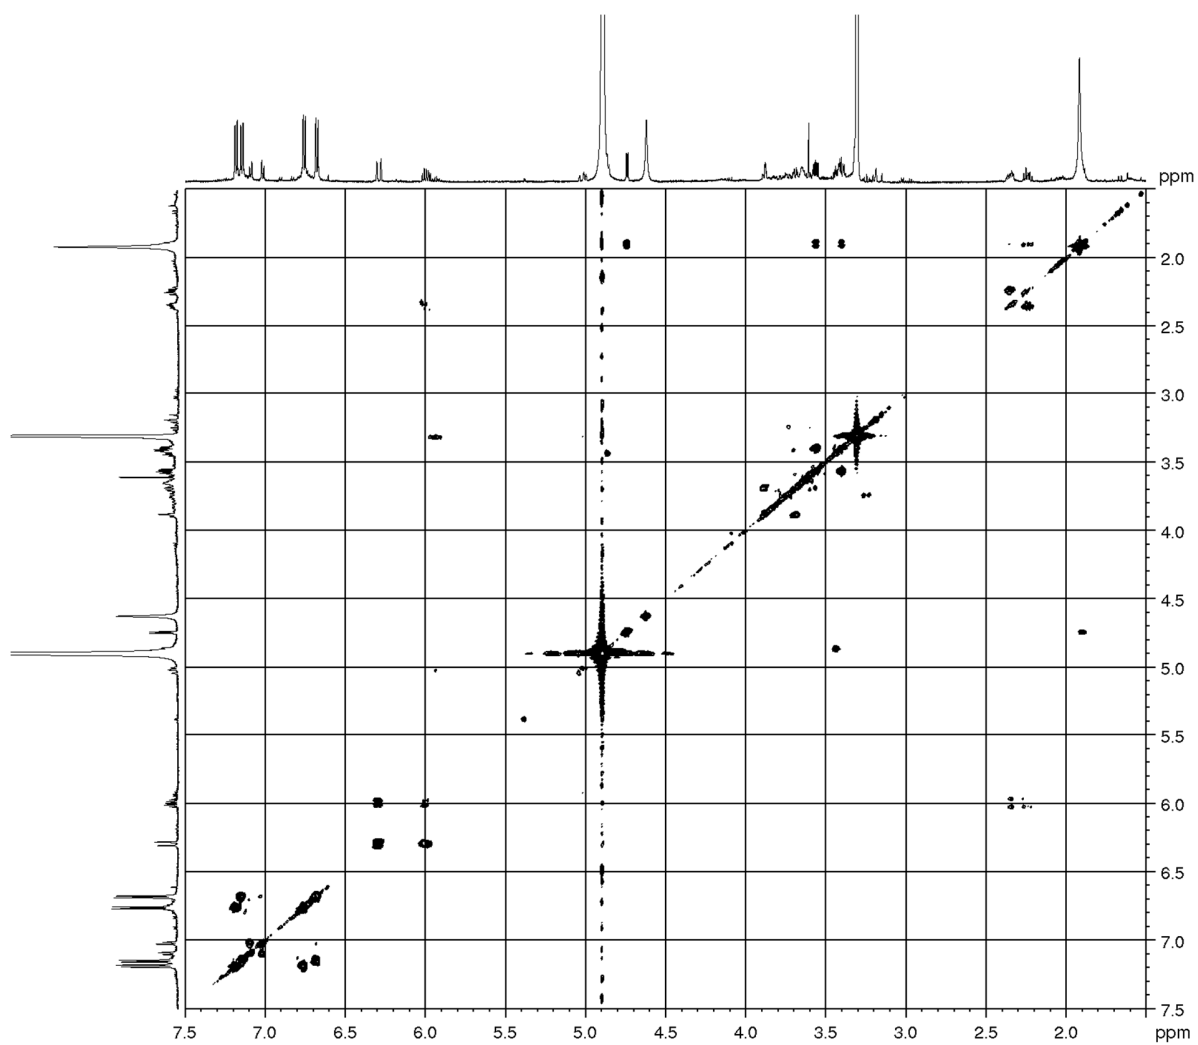

**Figure S17.** COSY spectrum of galanganol A (**5**) (methanol- $d_4$ )

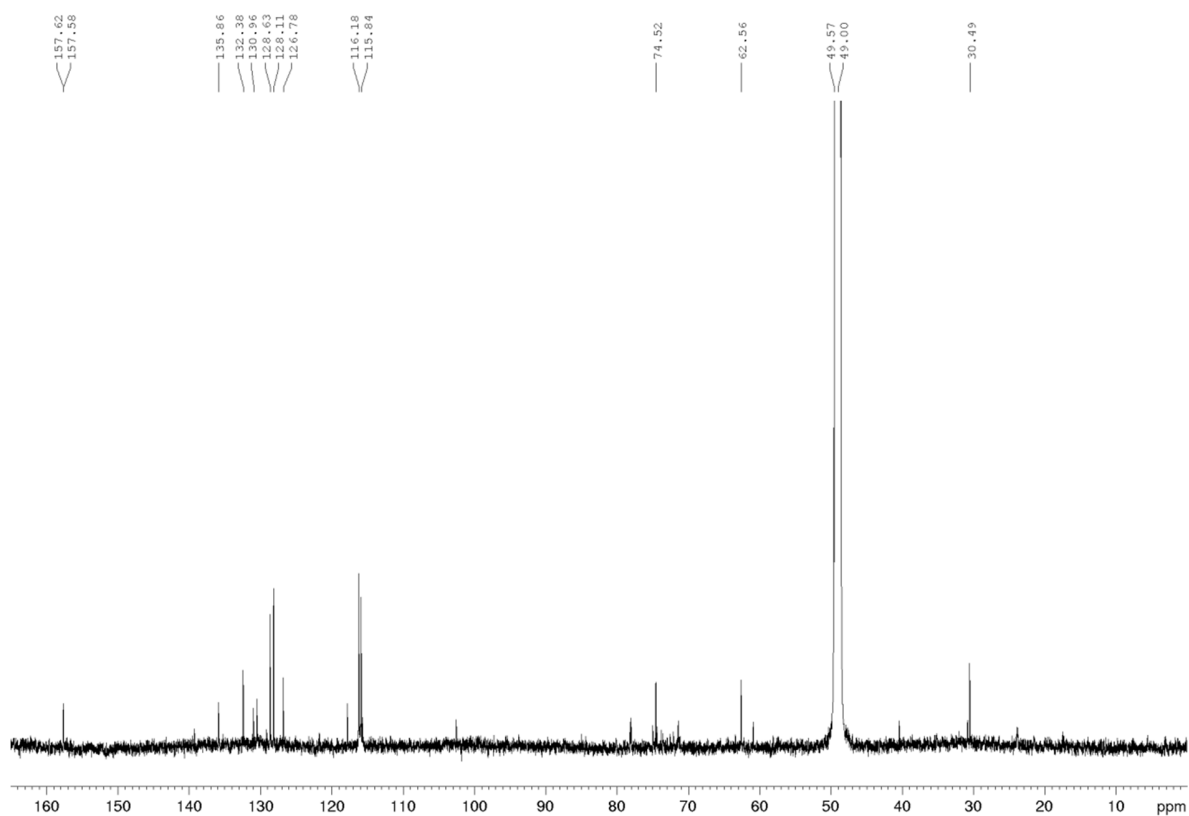

**Figure S18.**  $^{13}\text{C}$  NMR spectrum of galanganol A (5) (methanol- $d_4$ )

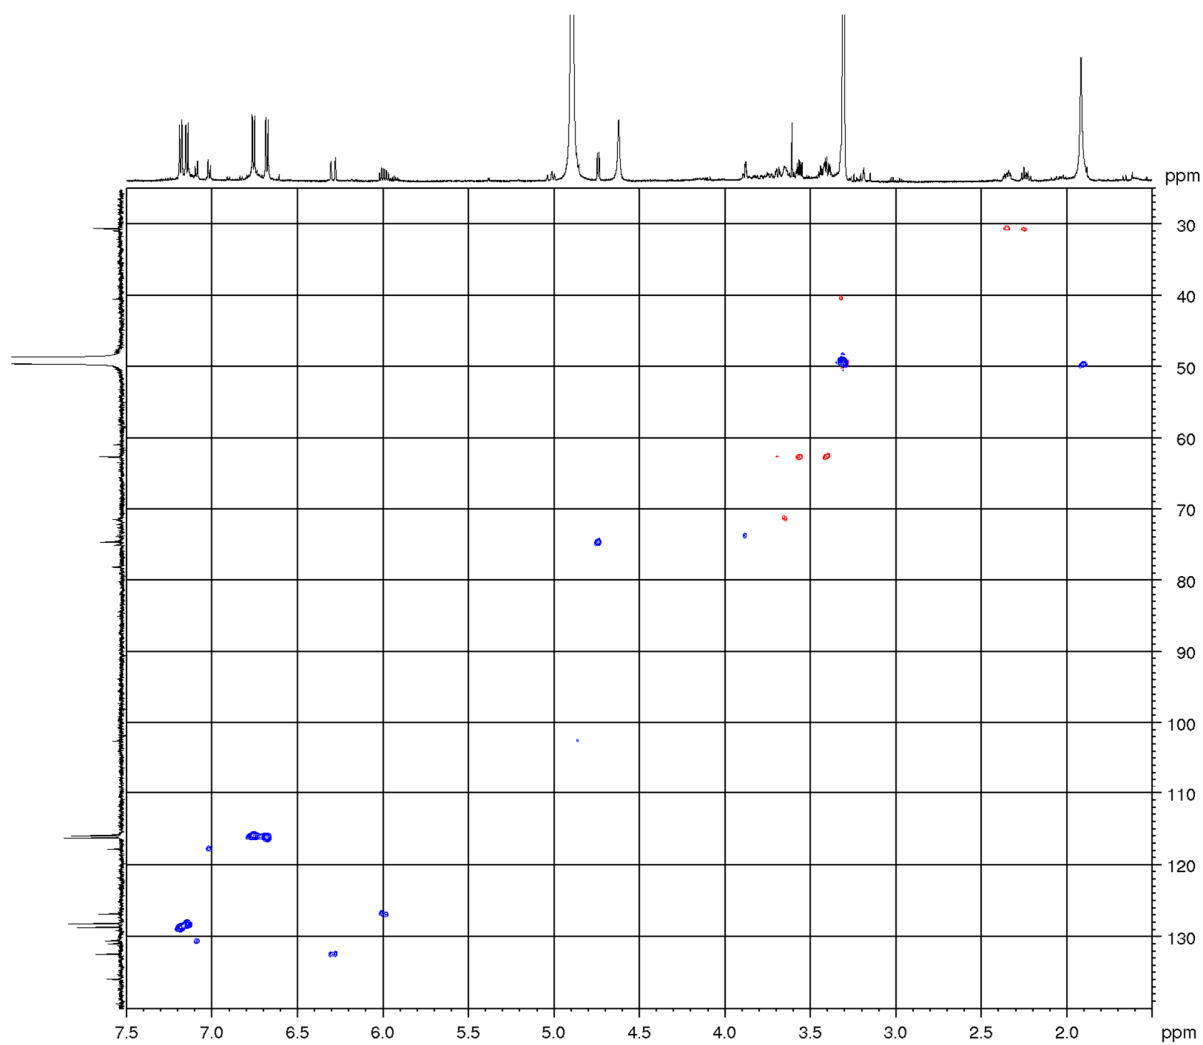

**Figure S19.** HSQC spectrum of galanganol A (**5**) (methanol- $d_4$ )



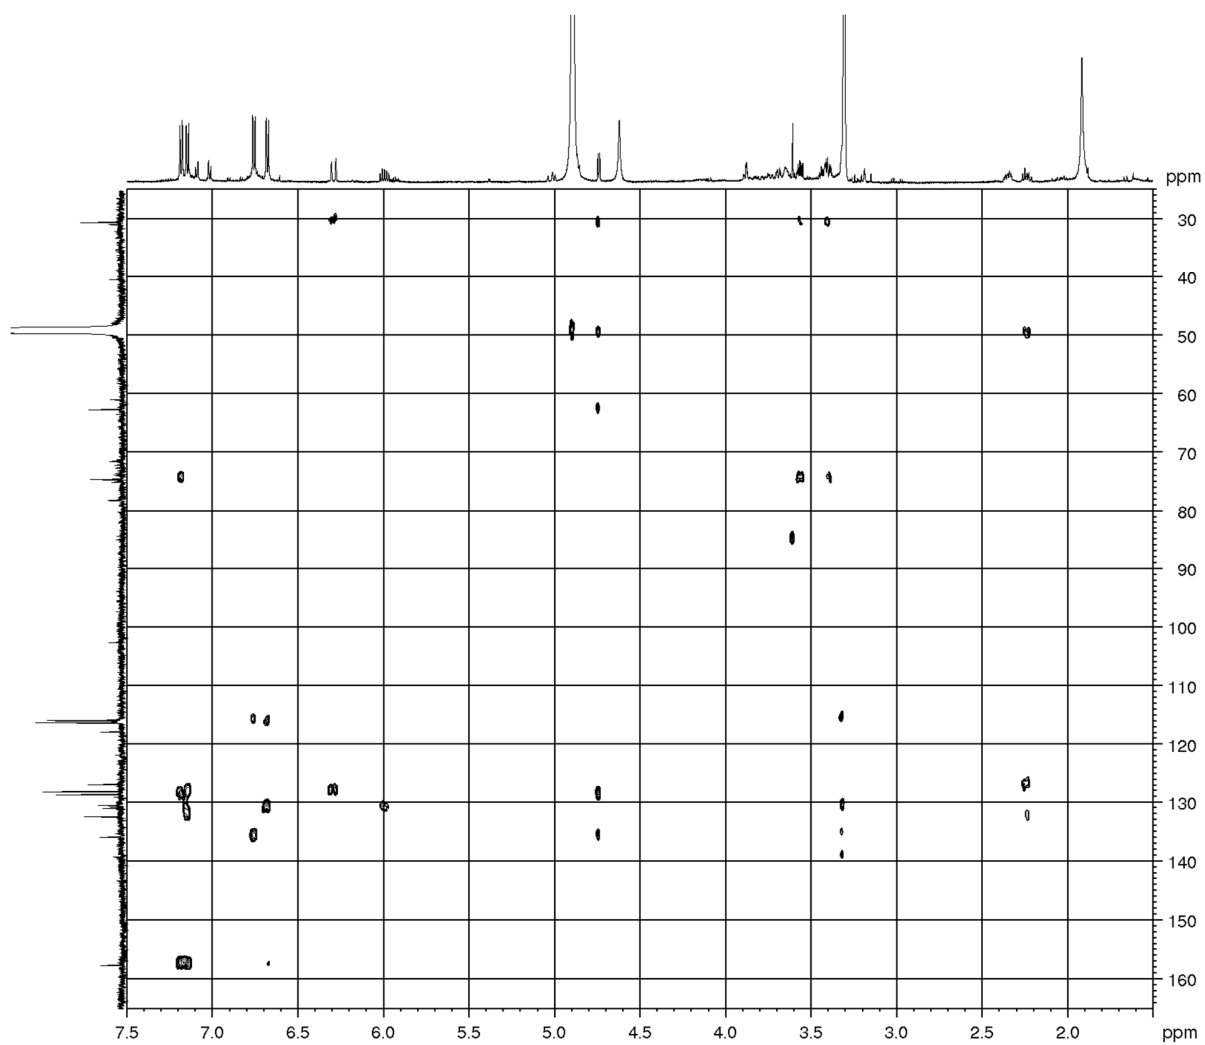

**Figure S20.** HMBC spectrum of galanganol A (5) (methanol-*d*<sub>4</sub>)

$^1\text{H}$  and  $^{13}\text{C}$  NMR data of galanganol B (6)

$^1\text{H}$  NMR (methanol- $d_4$ , 600 MHz, 295 K):  $\delta$  7.18 (d,  $^3J_{\text{H,H}}=8.5$  Hz, 2H, H-2', H-6'), 7.13 (d,  $^3J_{\text{H,H}}=8.5$  Hz, 2H, H-2'', H-6''), 6.77 (d,  $^3J_{\text{H,H}}=8.5$  Hz, 2H, H-3', H-5'), 6.67 (d,  $^3J_{\text{H,H}}=8.5$  Hz, 2H, H-3'', H-5''), 6.19 (d,  $^3J_{\text{H,H}}=15.9$  Hz, 1H, H-5), 5.91 (m, 1H, H-4), 4.61 (d,  $^3J_{\text{H,H}}=7.3$  Hz, 1H, H-1), 3.78 (m, 1H, H-6a), 3.65 (m, 1H, H-6b), 2.12 (m, 1H, H-3a), 2.02 (m, 1H, H-3b), 1.91 (m, 1H, H-2).  $^{13}\text{C}$  NMR (methanol- $d_4$ , 150 MHz, 295 K):  $\delta$  157.9 (C-4'), 157.7 (C-4''), 135.7 (C-1'), 132.5 (C-5), 130.8 (C-1''), 129.1 (C-2', C-6'), 128.1 (C-2'', C-6''), 126.2 (C-4), 116.2 (C-3'', C-5''), 115.9 (C-3', C-5'), 76.3 (C-1), 63.1 (C-6), 49.0 (C-2), 32.3 (C-3).

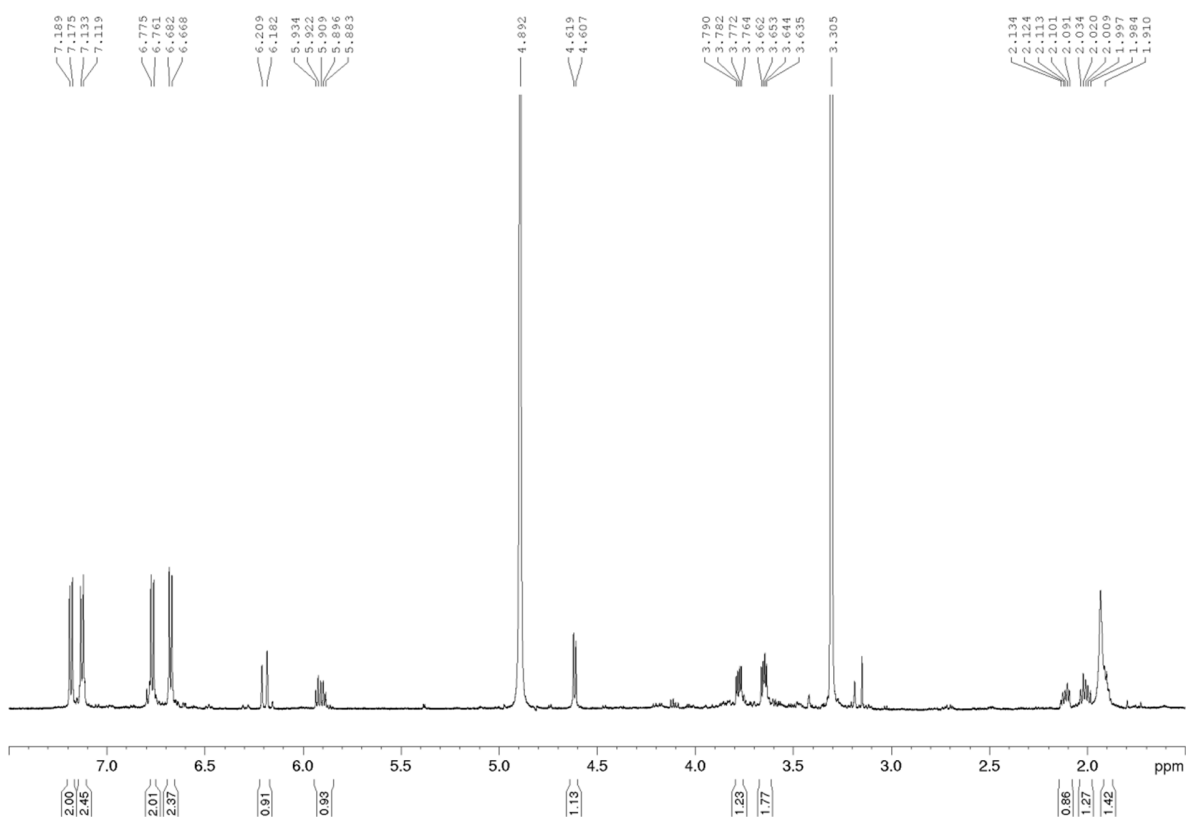

**Figure S21.**  $^1\text{H}$  NMR spectrum of galanganol B (6) (methanol- $d_4$ )

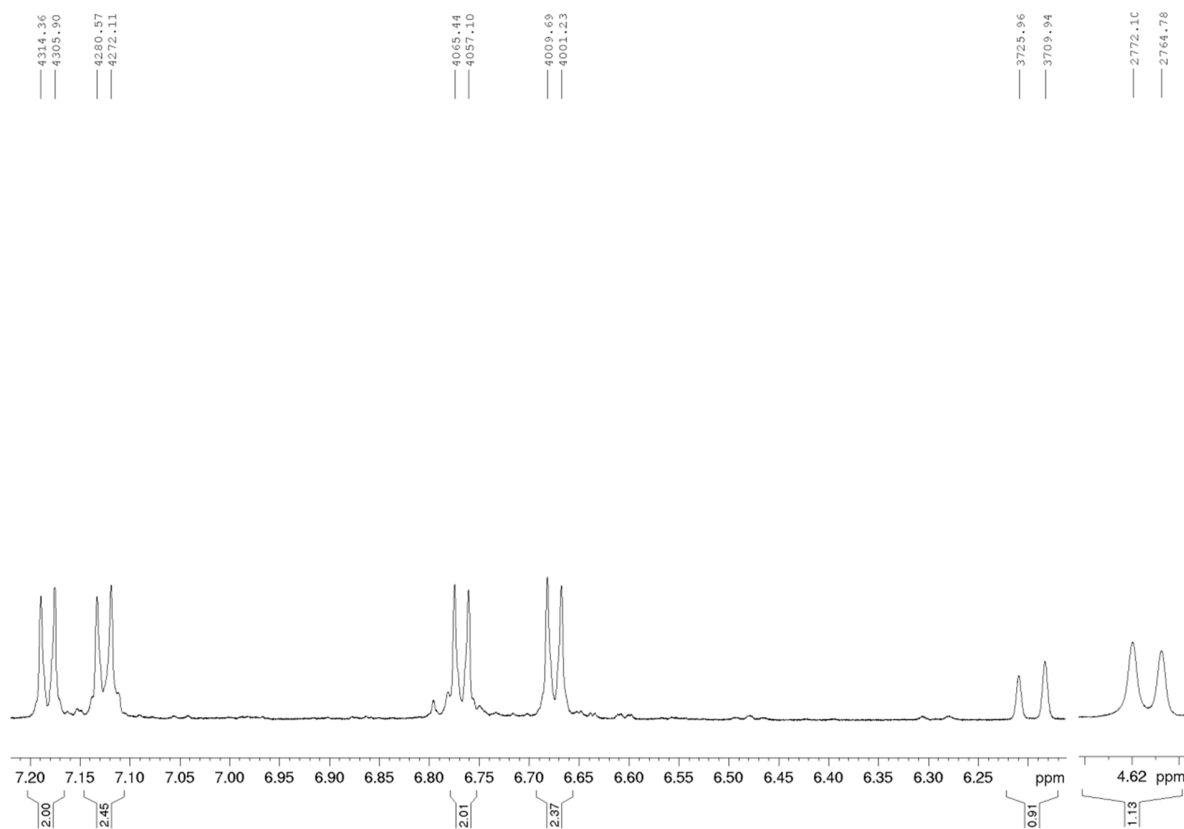

**Figure S22.** Selected  $^1\text{H}$  NMR spectral regions of galanganol B (**6**) (methanol- $d_4$ )

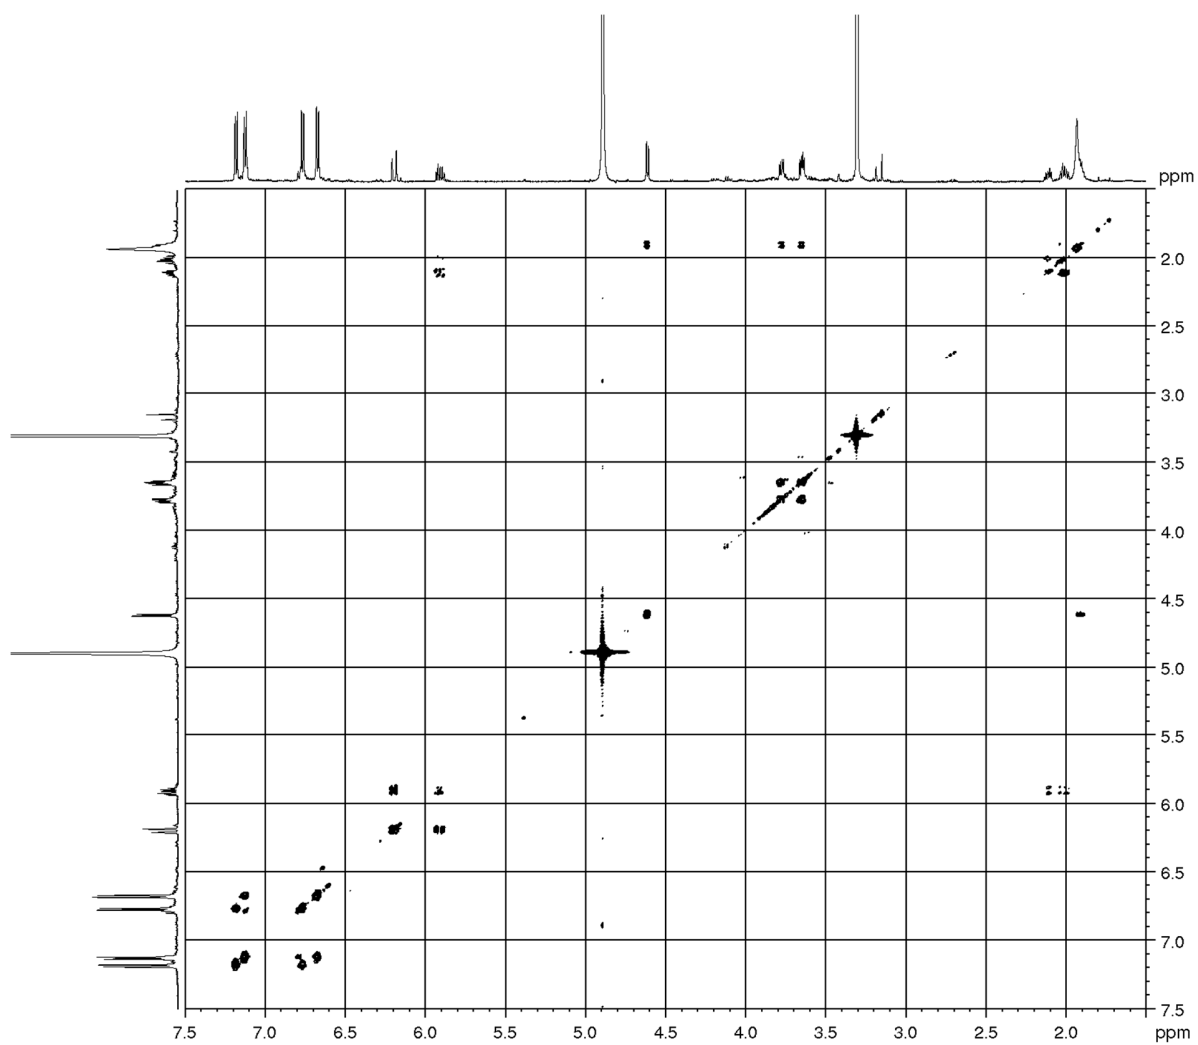

**Figure S23.** COSY spectrum of galanganol B (**6**) (methanol-*d*<sub>4</sub>)

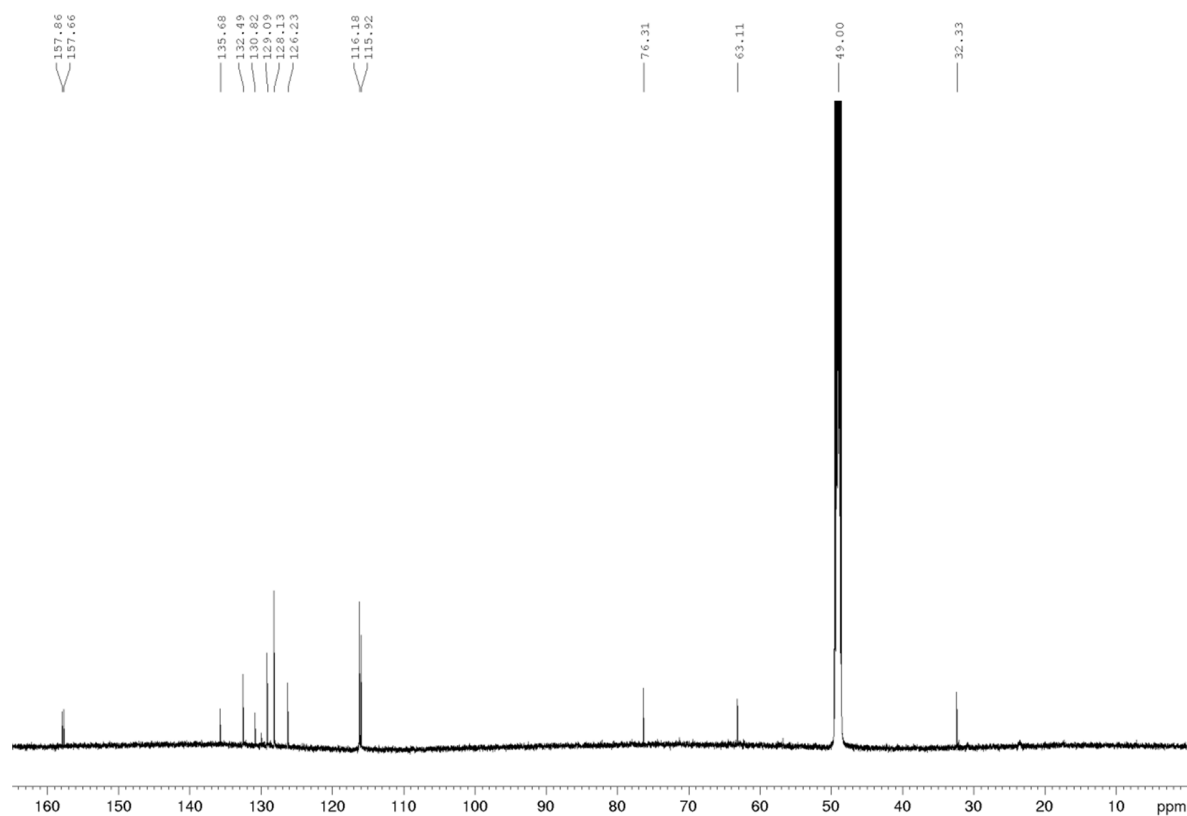

Figure S24.  $^{13}\text{C}$  NMR spectrum of galanganol B (6) (methanol- $d_4$ )

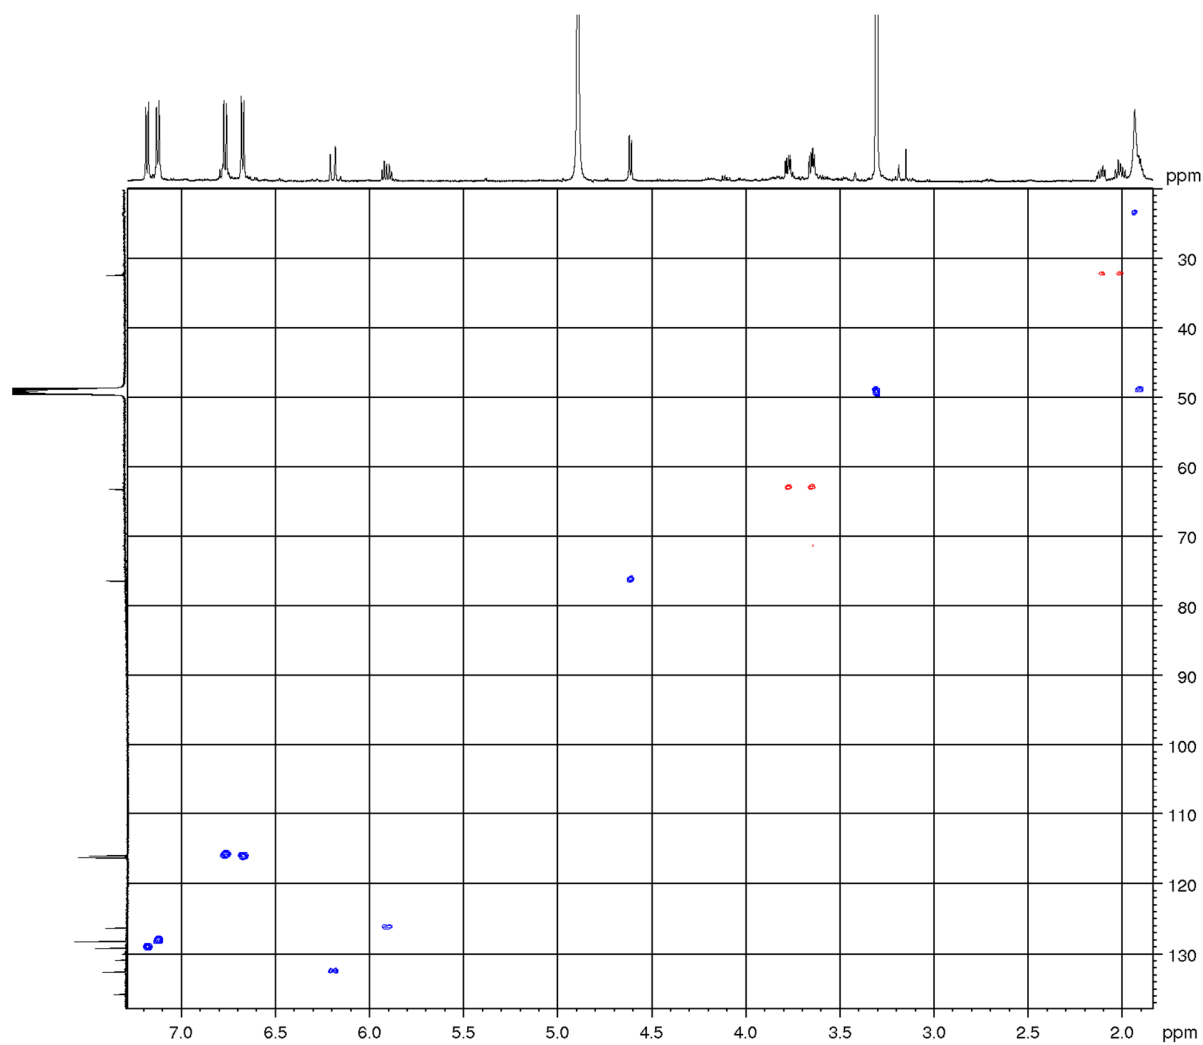

**Figure S25.** HSQC spectrum of galanganol B (**6**) (methanol- $d_4$ )

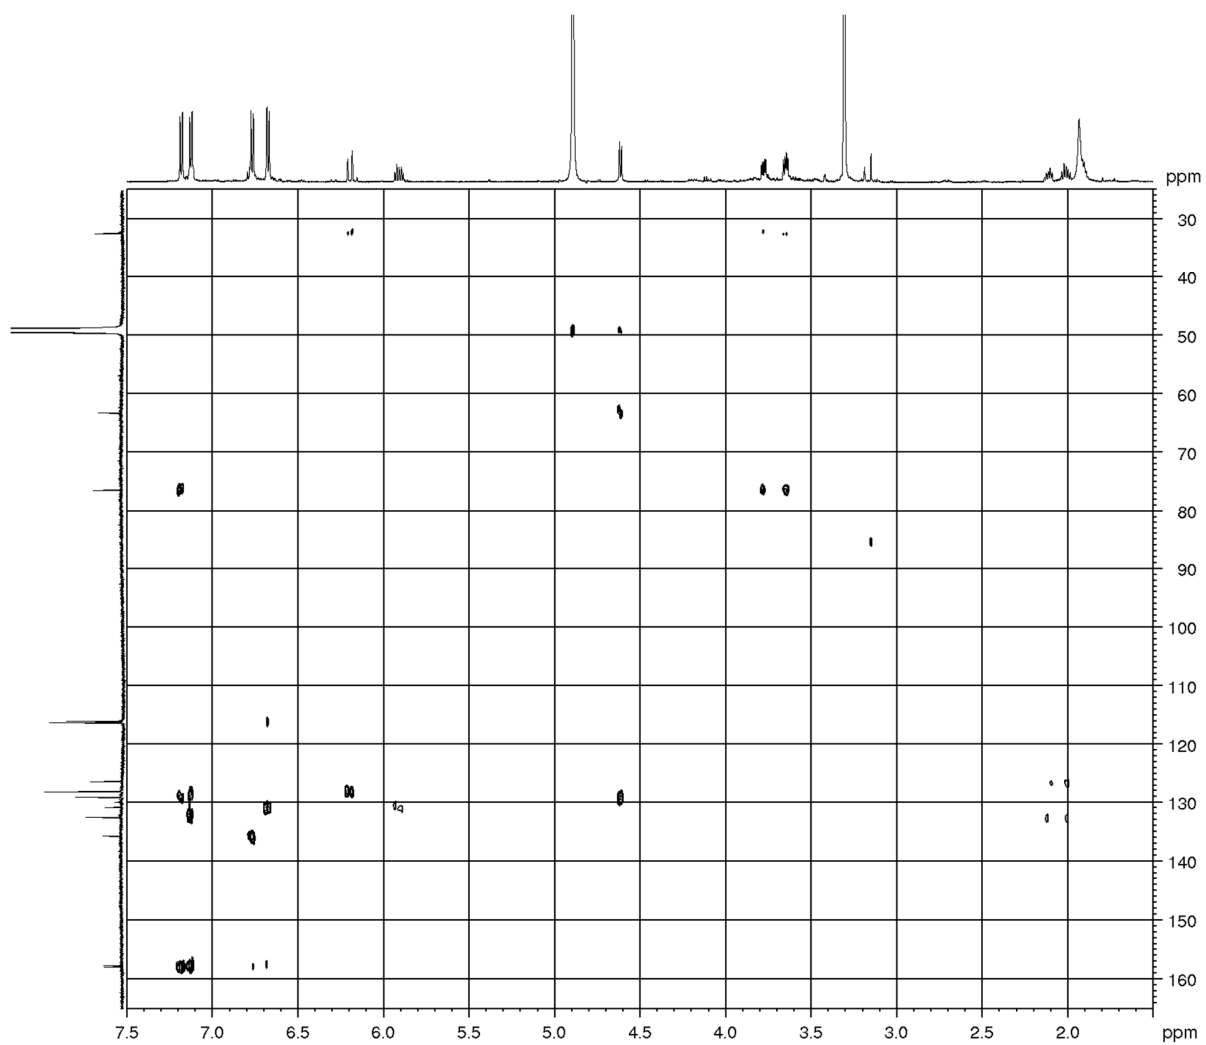

**Figure S26.** HMBC spectrum of galanganol B (6) (methanol-*d*<sub>4</sub>)

$^1\text{H}$  and  $^{13}\text{C}$  NMR data of *trans*-*p*-acetoxycinnamyl alcohol (7)

$^1\text{H}$  NMR (methanol- $d_4$ , 600 MHz, 295 K):  $\delta$  7.43 (d,  $^3J_{\text{H,H}}=8.6$  Hz, 2H, H-2', H-6'), 7.04 (d,  $^3J_{\text{H,H}}=8.6$  Hz, 2H, H-3', H-5'), 6.61 (d,  $^3J_{\text{H,H}}=15.9$  Hz, 1H, H-1), 6.35 (dt,  $^3J_{\text{H,H}}=15.9$  Hz,  $^3J_{\text{H,H}}=5.6$  Hz, 1H, H-2), 4.22 (d,  $^3J_{\text{H,H}}=5.6$  Hz, 1H, H-3), 2.26 (s, 3H, H-4'-OAc).  $^{13}\text{C}$  NMR (methanol- $d_4$ , 150 MHz, 295 K):  $\delta$  171.2 (C-4'-OAc), 151.6 (C-4'), 136.2 (C-1'), 130.5 (C-1), 130.4 (C-2), 128.3 (C-2', C-6'), 122.9 (C-3', C-5'), 63.6 (C-3), 20.9 (C-4'-OAc).

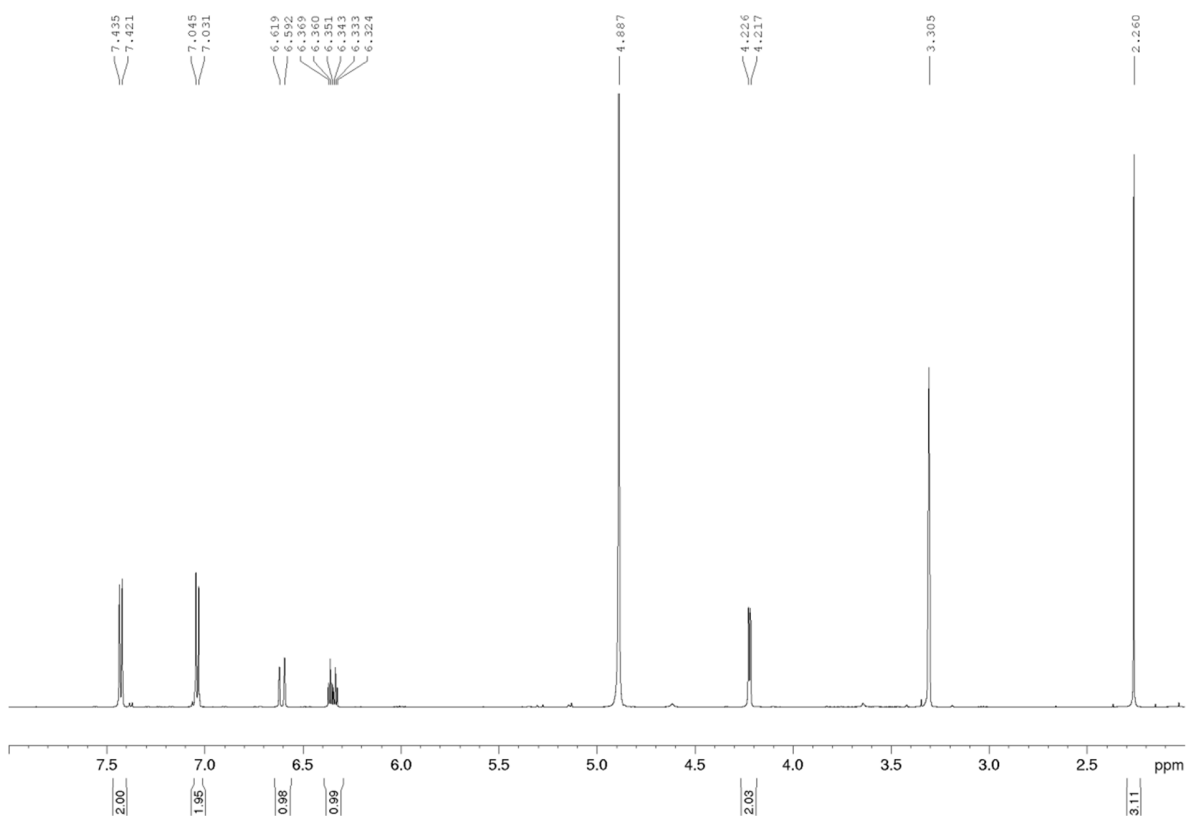

**Figure S27.**  $^1\text{H}$  NMR spectrum of *trans*-*p*-acetoxycinnamyl alcohol (7) (methanol- $d_4$ )



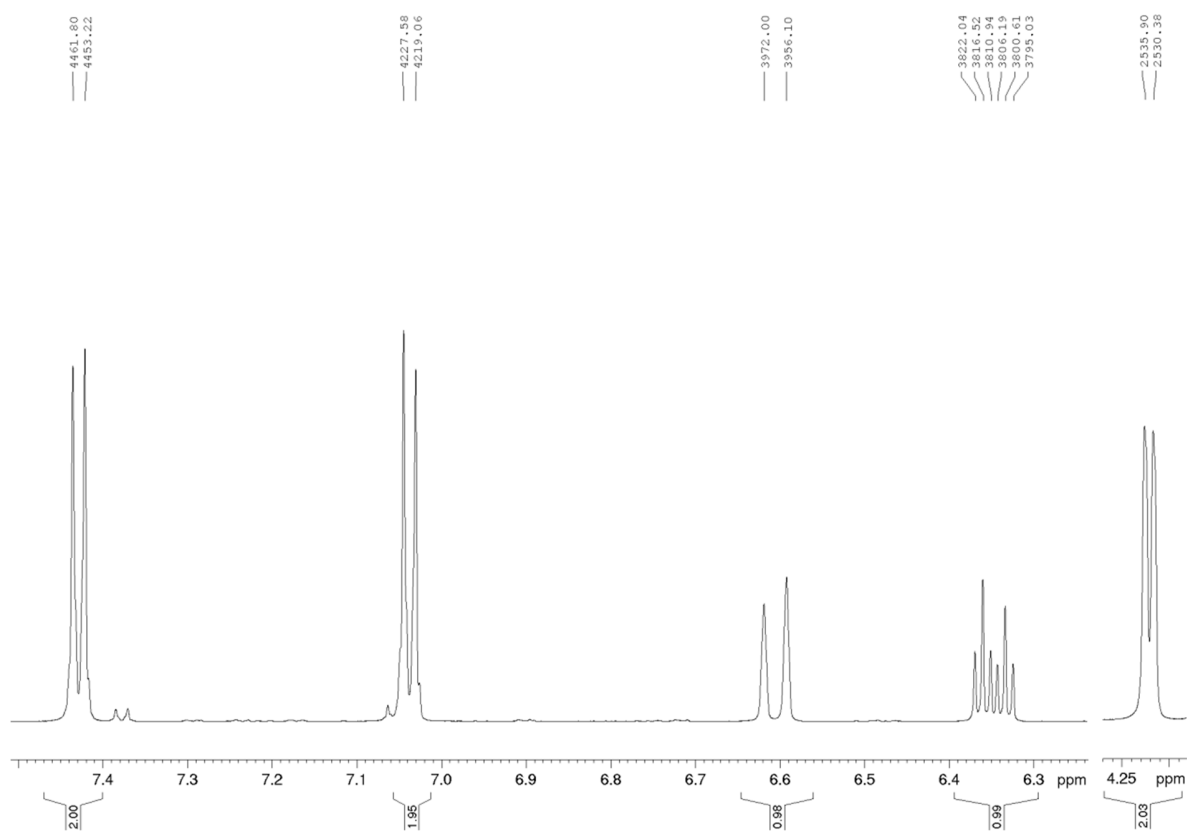

**Figure S28.** Selected  $^1\text{H}$  NMR spectral regions of *trans-p*-acetoxycinnamyl alcohol (7) ( $\text{methanol-}d_4$ )

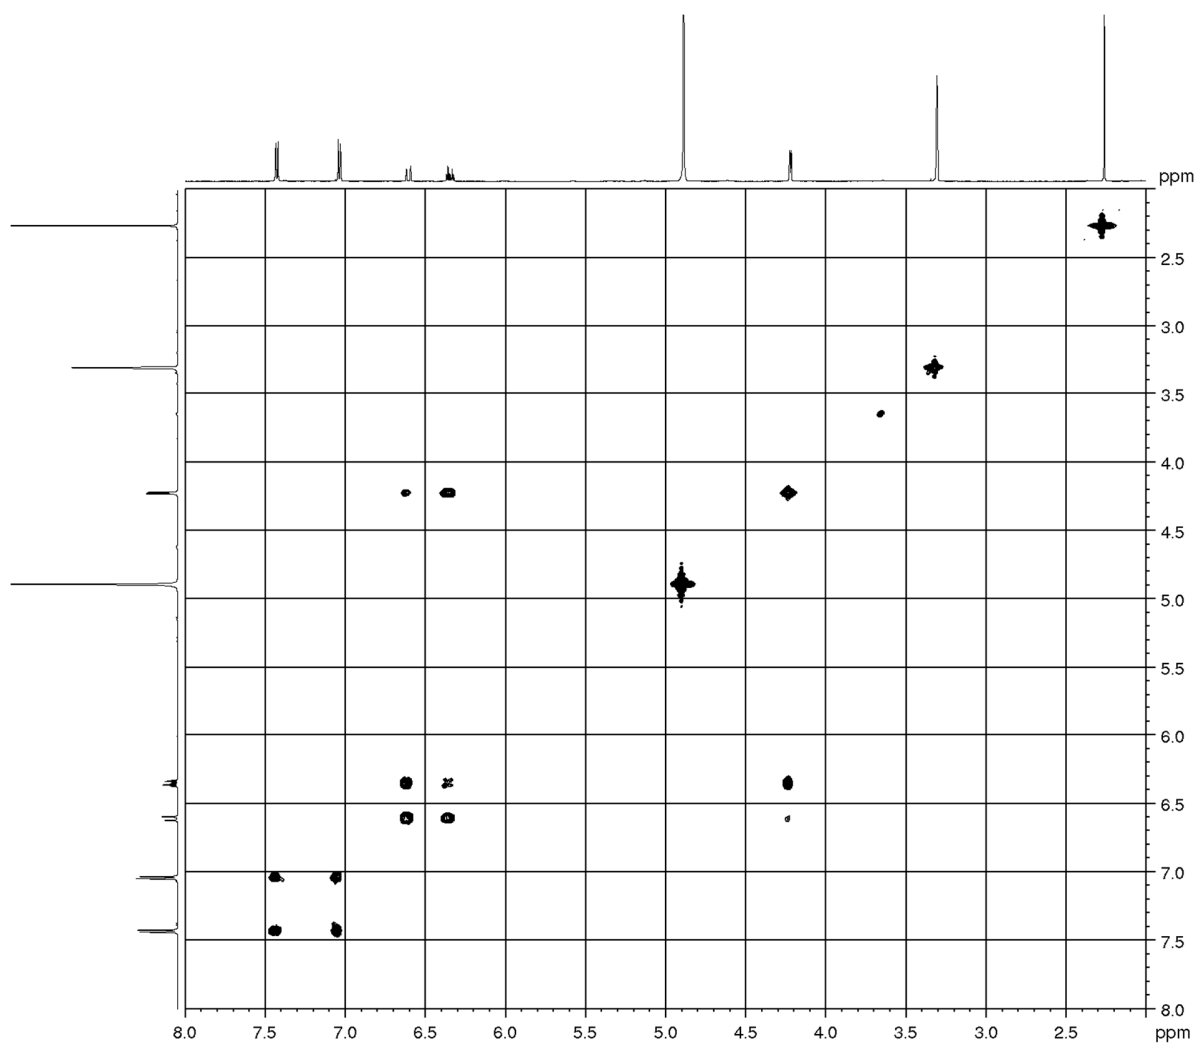

**Figure S29.** COSY spectrum of *trans-p*-acetoxycinnamyl alcohol (7) (methanol-*d*<sub>4</sub>)

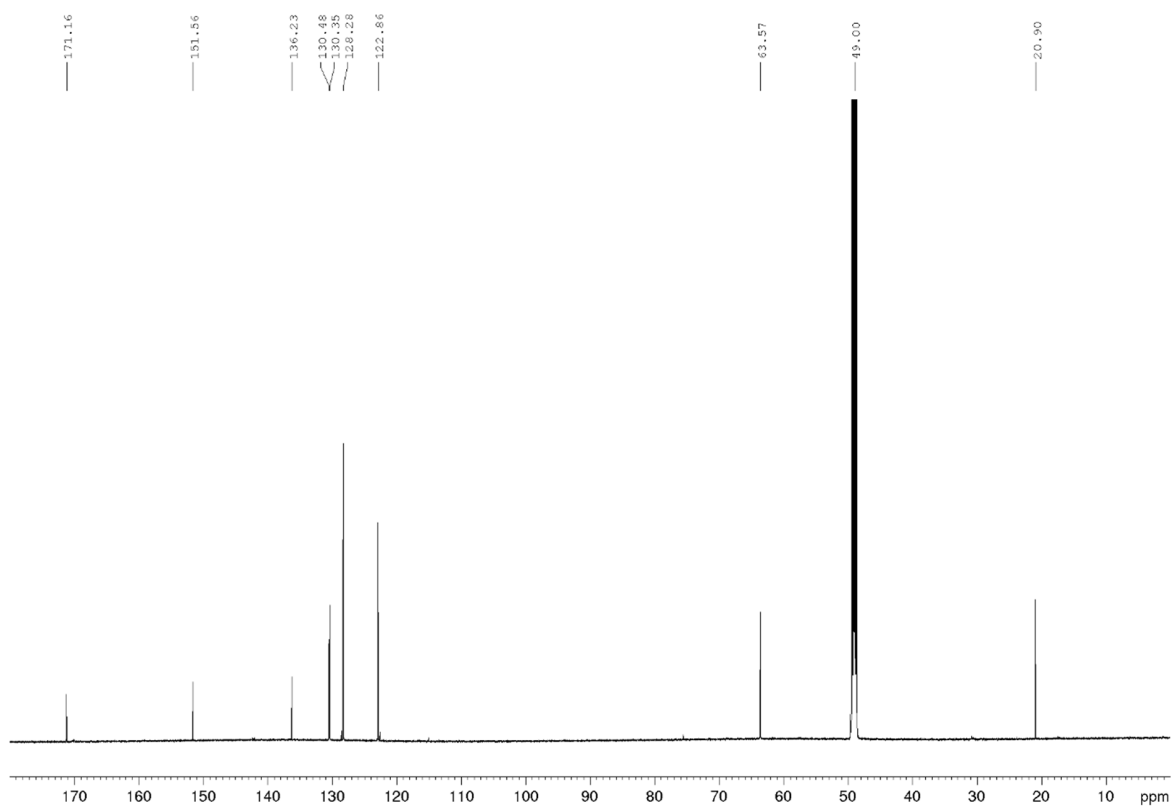

**Figure S30.**  $^{13}\text{C}$  spectrum of *trans-p*-acetoxycinnamyl alcohol (7) ( $\text{methanol-}d_4$ )

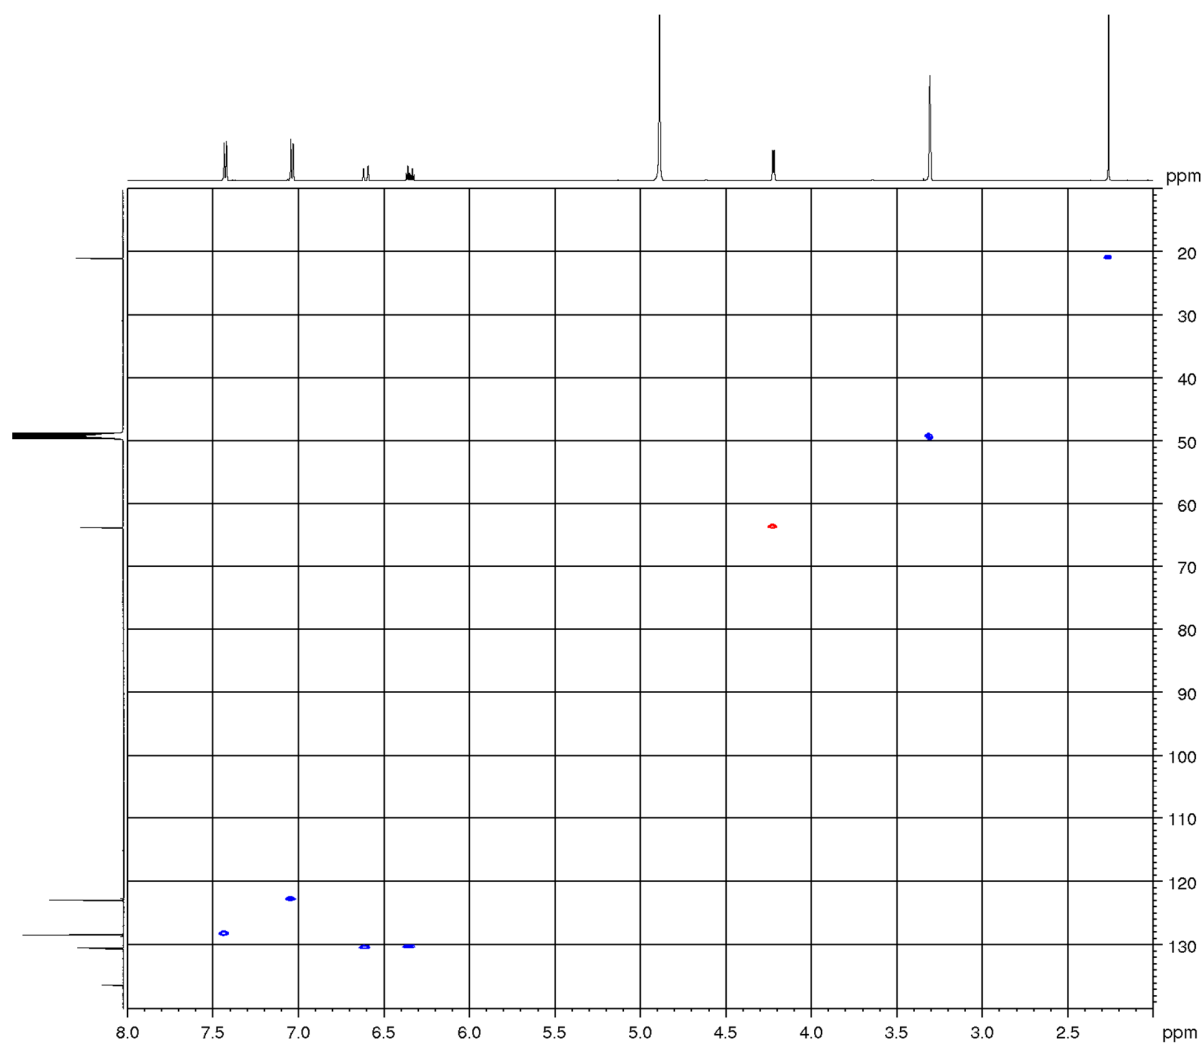

**Figure S31.** HSQC spectrum of *trans*-*p*-acetoxycinnamyl alcohol (7) (methanol-*d*<sub>4</sub>)

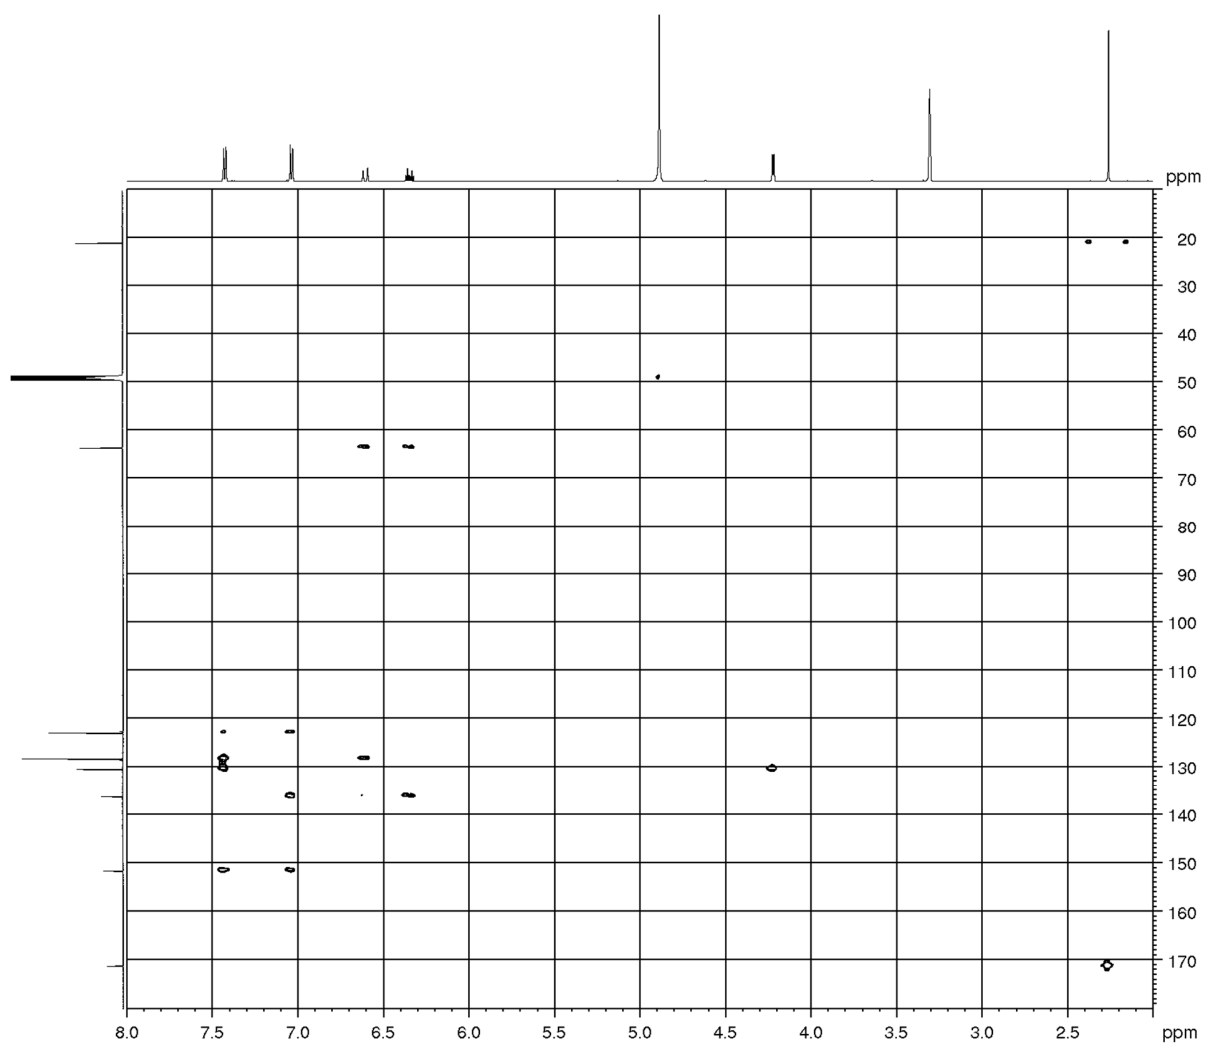

**Figure S32.** HMBC spectrum of *trans-p*-acetoxycinnamyl alcohol (7) (methanol-*d*<sub>4</sub>)

$^1\text{H}$  and  $^{13}\text{C}$  NMR data of 1'S-1'-acetoxychavicol acetate (**9**)

$^1\text{H}$  NMR (methanol- $d_4$ , 600 MHz, 295 K):  $\delta$  7.38 (d,  $^3J_{\text{H,H}}=8.5$  Hz, 2H, H-2', H-6'), 7.09 (d,  $^3J_{\text{H,H}}=8.5$  Hz, 2H, H-3', H-5'), 6.24 (d,  $^3J_{\text{H,H}}=5.9$  Hz, 1H, H-1'), 6.03 (m, 1H, H-2'), 5.29 (dt,  $^2J_{\text{H,H}}=17.0$  Hz,  $^3J_{\text{H,H}}=1.3$  Hz, 1H, H-3'a), 5.24 (dt,  $^2J_{\text{H,H}}=10.5$  Hz,  $^3J_{\text{H,H}}=1.3$  Hz, 1H, H-3'b), 2.26 (s, 3H, H-4-OAc), 2.08 (s, 3H, H-1'-OAc).  $^{13}\text{C}$  NMR (methanol- $d_4$ , 150 MHz, 295 K):  $\delta$  171.6 (C-1'-OAc), 171.1 (C-4-OAc), 152.0 (C-4), 138.0 (C-1), 137.6 (C-2'), 129.3 (C-2, C-6), 122.9 (C-3, C-5), 117.3 (C-3'), 77.1 (C-1'), 21.0 (C-1'-OAc), 20.9 (C-4-OAc).

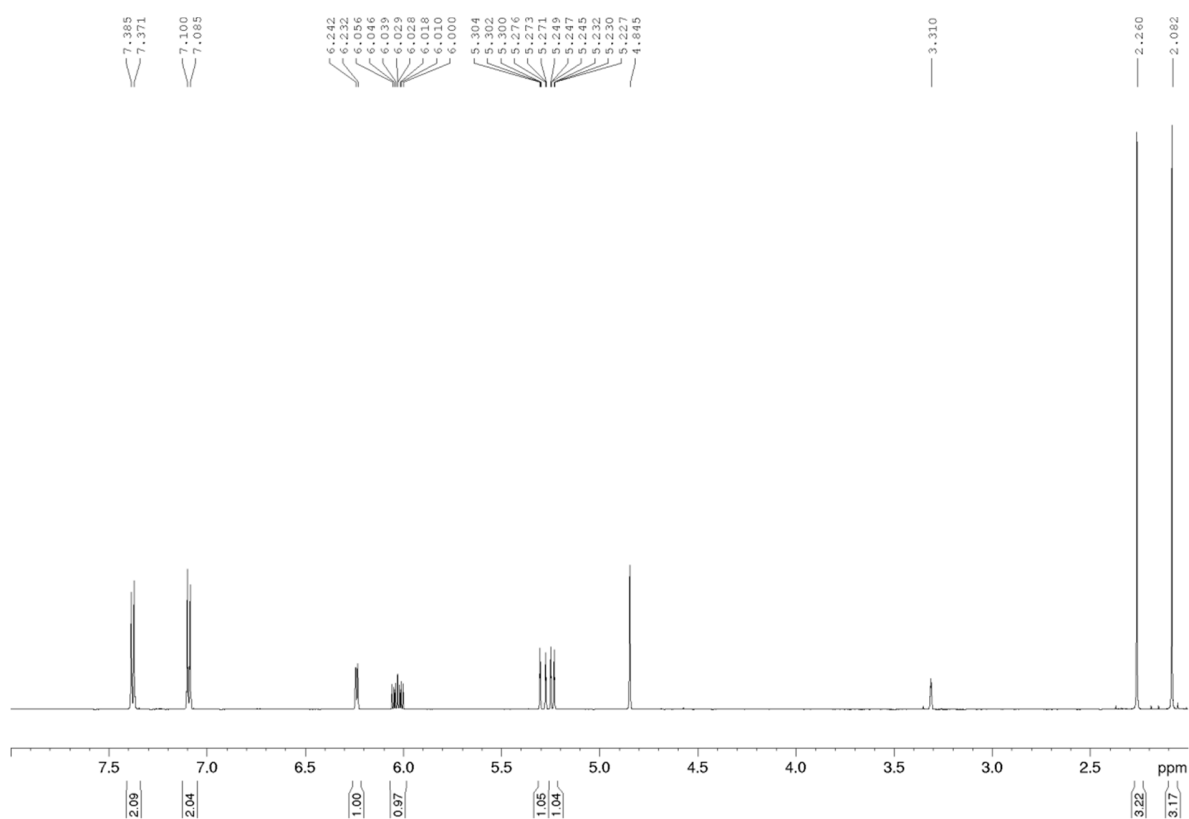

**Figure S33.**  $^1\text{H}$  NMR spectrum of 1'S-1'-acetoxychavicol acetate (**9**) (methanol- $d_4$ )

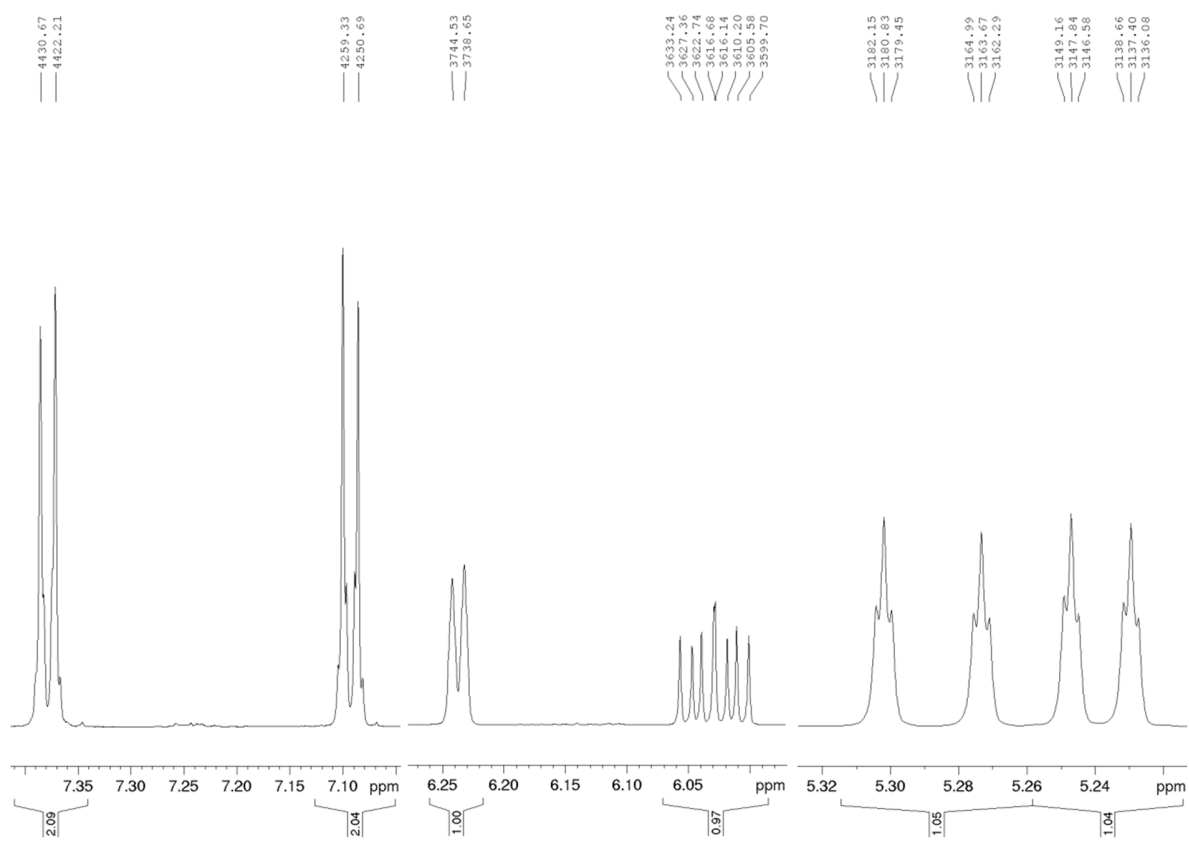

**Figure S34.** Selected  $^1\text{H}$  NMR spectral regions of 1'S-1'-acetoxychavicol acetate (9) (methanol- $d_4$ )

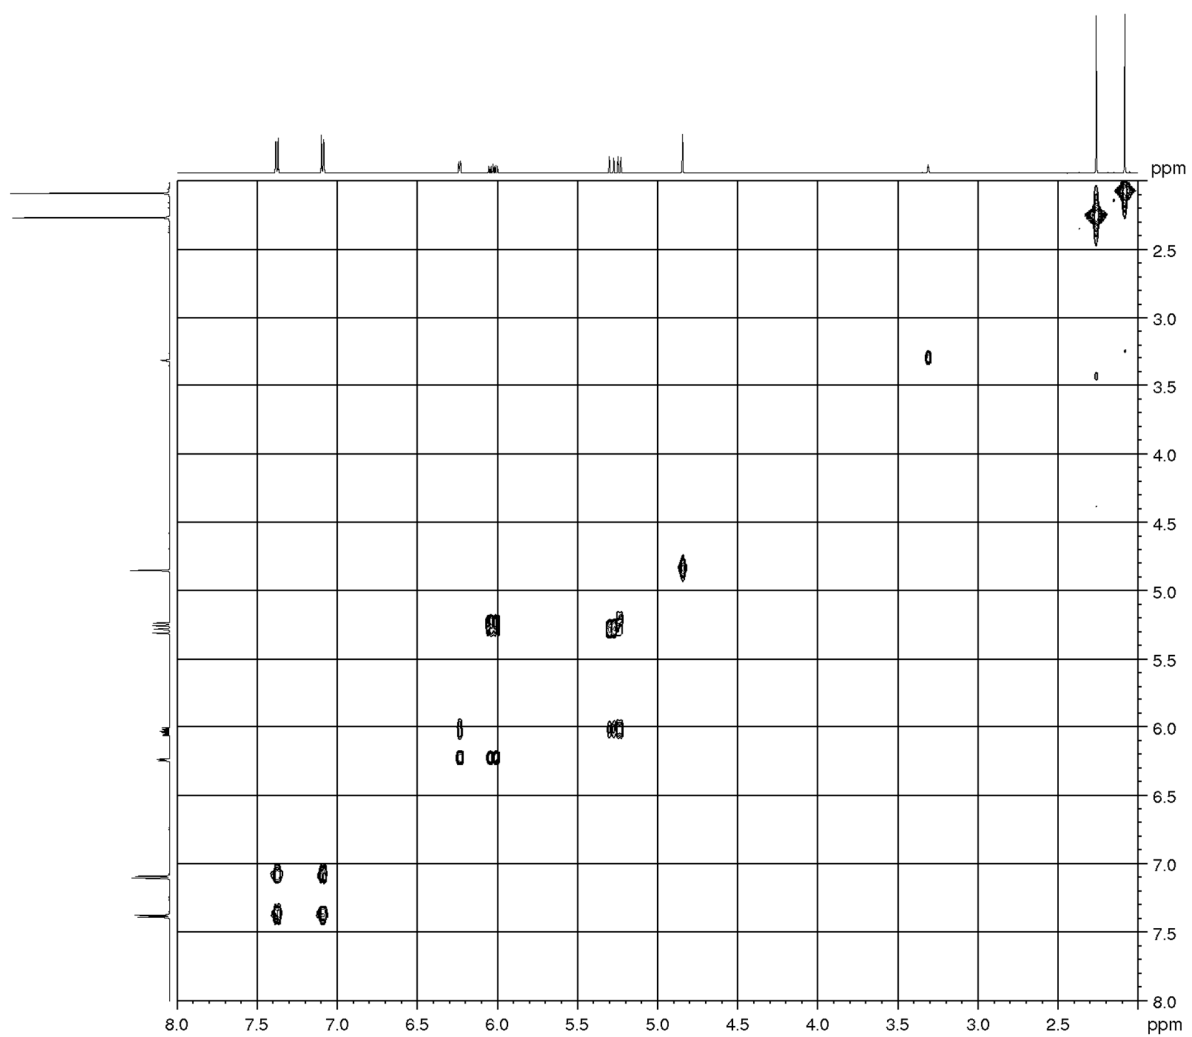

**Figure S35.** COSY spectrum of 1'S-1'-acetoxychavicol acetate (**9**) (methanol-*d*<sub>4</sub>)



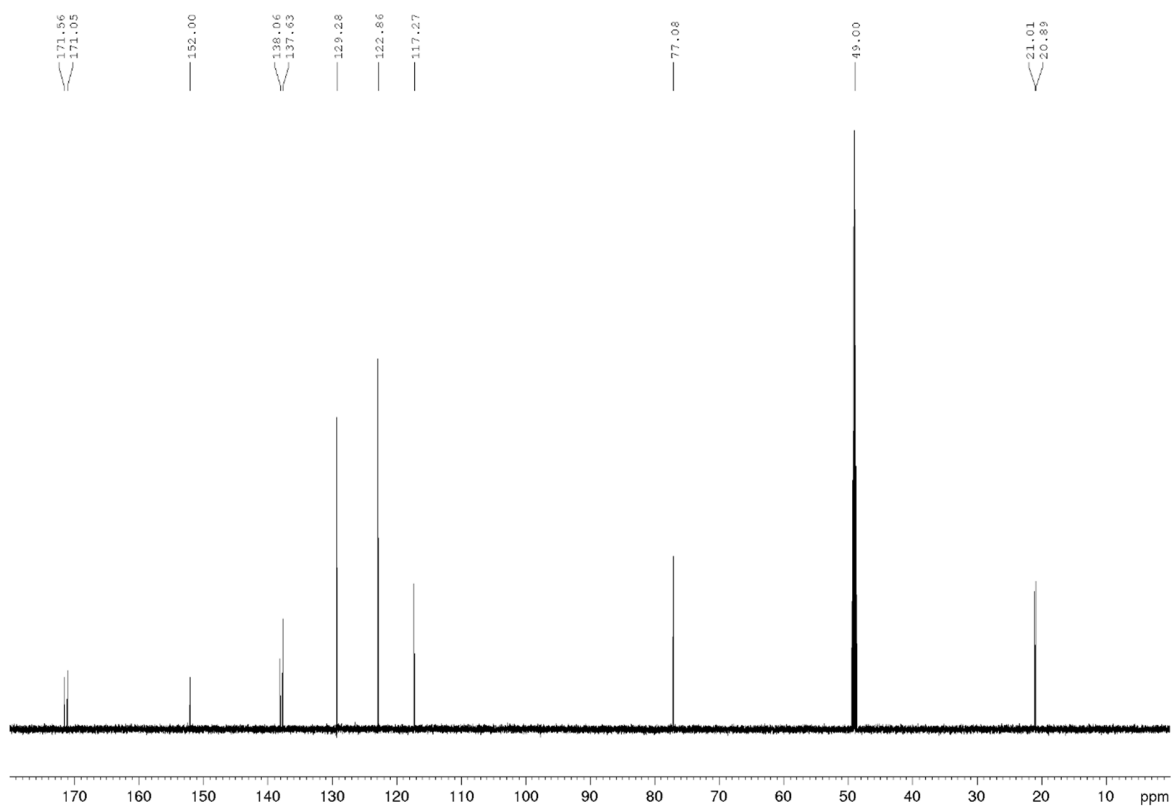

**Figure S36.**  $^{13}\text{C}$  NMR spectrum of 1 'S'-1'-acetoxychavicol acetate (9) (methanol- $d_4$ )

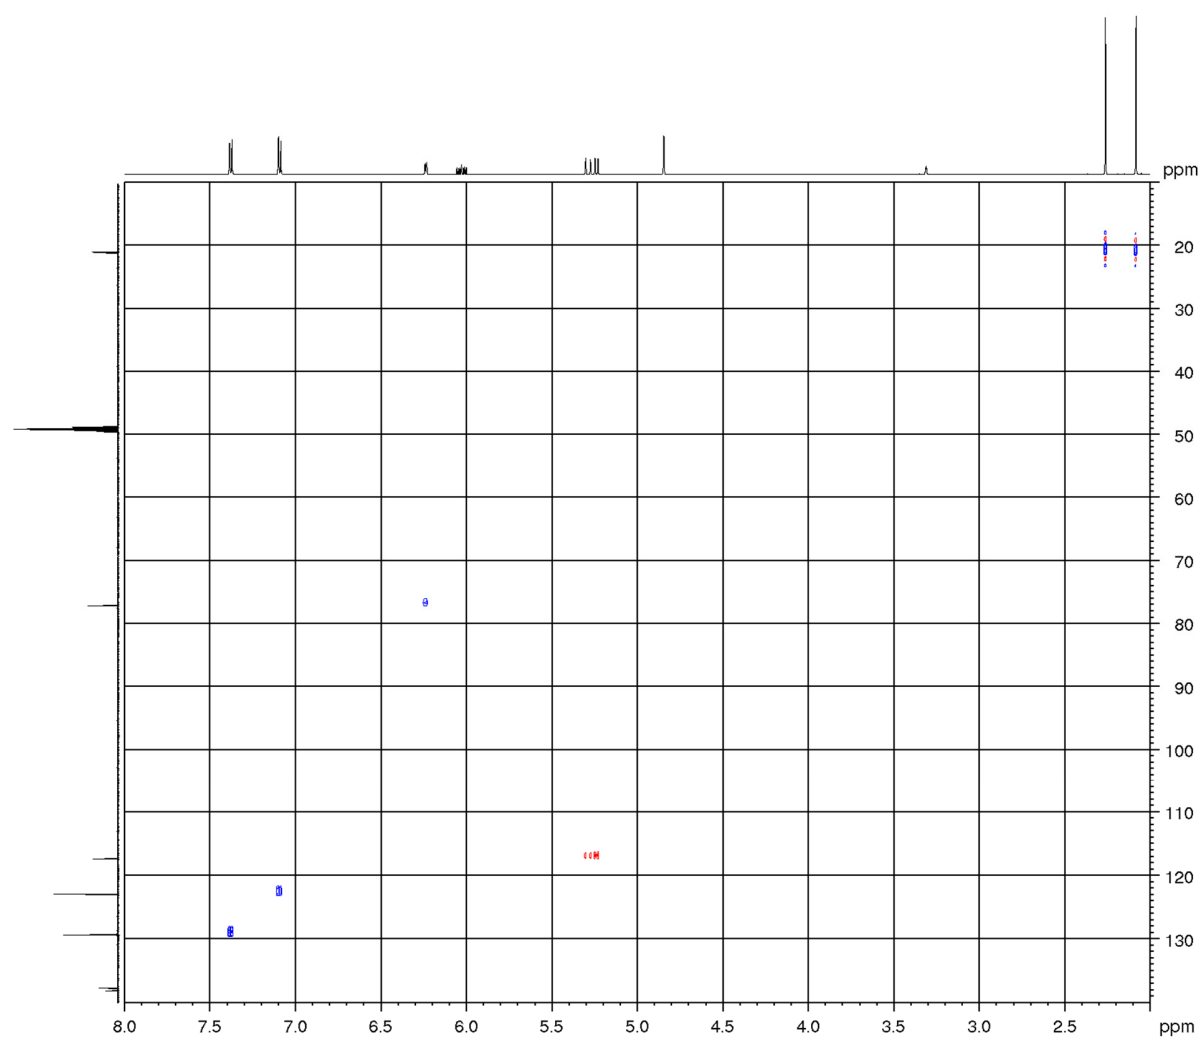

**Figure S37.** HSQC spectrum of 1'S-1'-acetoxychavicol acetate (**9**) (methanol- $d_4$ )

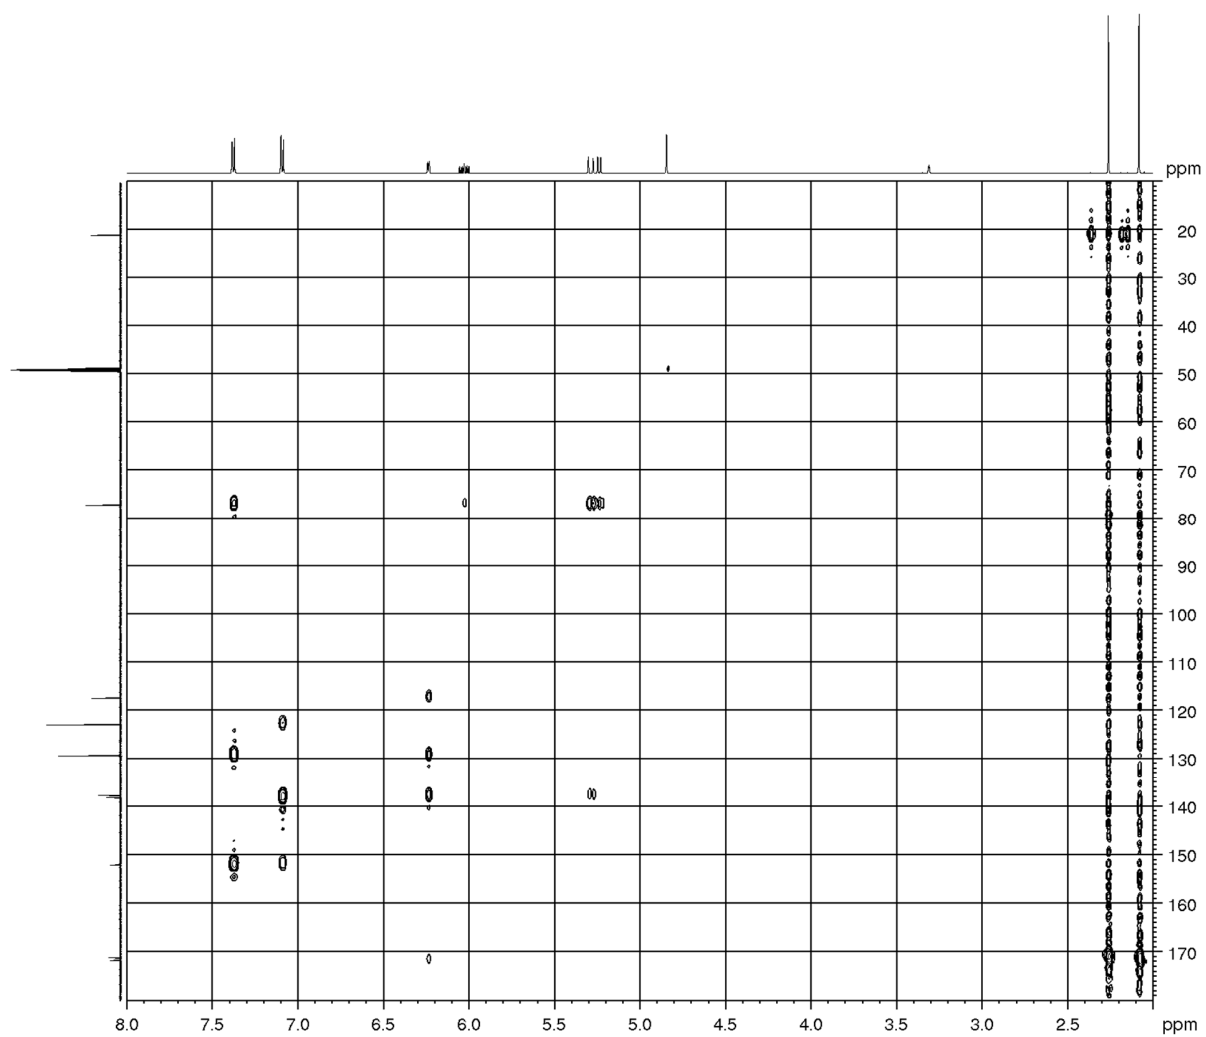

**Figure S38.** HMBC spectrum of 1'S-1'-acetoxychavicol acetate (**9**) (methanol- $d_4$ )

**$^1\text{H}$  and  $^{13}\text{C}$  NMR data of 1 'S'-1'-acetoxyeugenol acetate (10)**

$^1\text{H}$  NMR (methanol- $d_4$ , 600 MHz, 295 K):  $\delta$  7.05 (d,  $^4J_{\text{H,H}}=1.6$  Hz, 1H, H-2) 7.02 (d,  $^3J_{\text{H,H}}=8.1$  Hz, 1H, H-5), 6.95 (dd,  $^3J_{\text{H,H}}=8.1$  Hz,  $^4J_{\text{H,H}}=1.6$  Hz, 1H, H-6), 6.22 (d,  $^3J_{\text{H,H}}=5.9$  Hz, 1H, H-1'), 6.04 (m, 1H, H-2'), 5.31 (d,  $^2J_{\text{H,H}}=17.1$  Hz, 1H, H-3'a), 5.25 (d,  $^2J_{\text{H,H}}=10.5$  Hz, 1H, H-3'b), 3.82 (s, 3H, H-3-OCH<sub>3</sub>), 2.25 (s, 3H, H-4-OAc), 2.10 (s, 3H, H-1'-OAc).  $^{13}\text{C}$  NMR (methanol- $d_4$ , 150 MHz, 295 K):  $\delta$  170.7 (C-1'-OAc), 170.3 (C-4-OAc), 152.7 (C-3), 140.9 (C-4), 139.5 (C-1), 137.6 (C-2'), 123.8 (C-5), 120.4 (C-2), 117.2 (C-3'), 112.5 (C-6), 77.4 (C-1'), 50.4 (C-3-OCH<sub>3</sub>), 21.0 (C-1'-OAc), 20.4 (C-4-OAc).

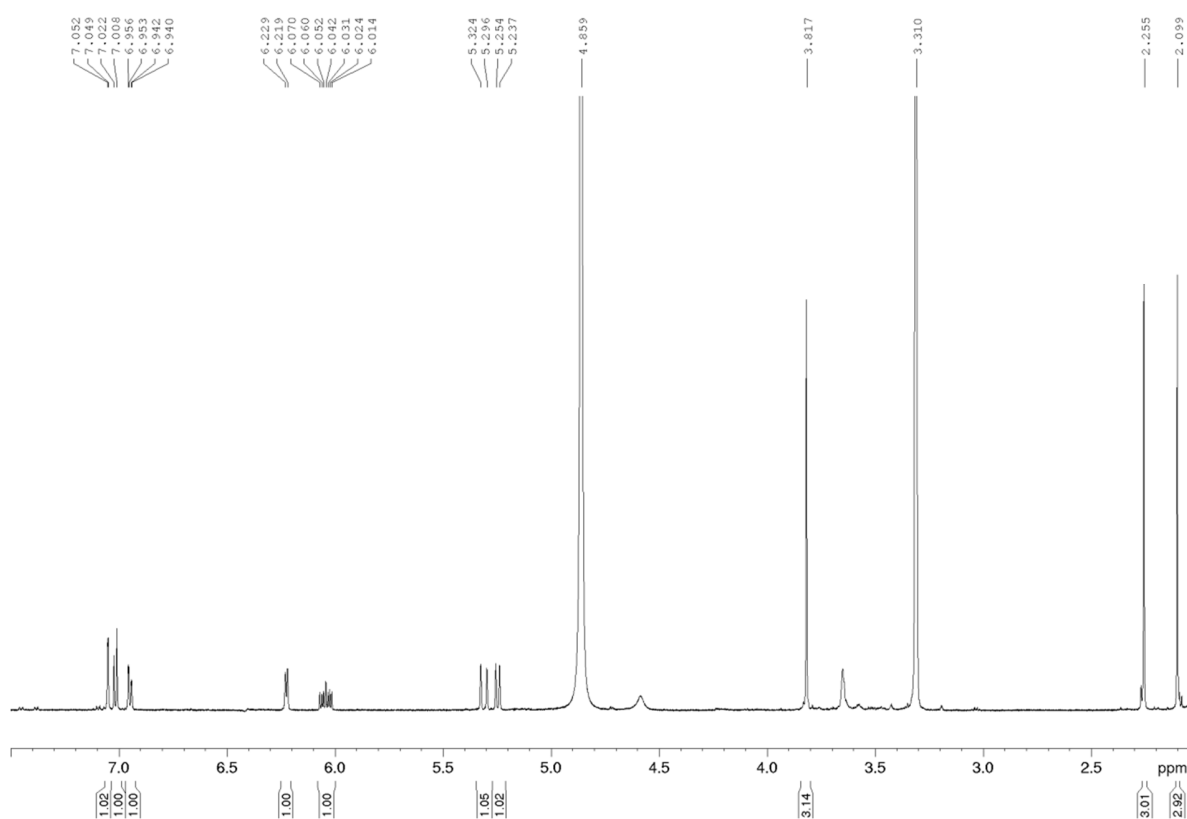

**Figure S39.**  $^1\text{H}$  NMR spectrum of 1 'S'-1'-acetoxyeugenol acetate (10) (methanol- $d_4$ )

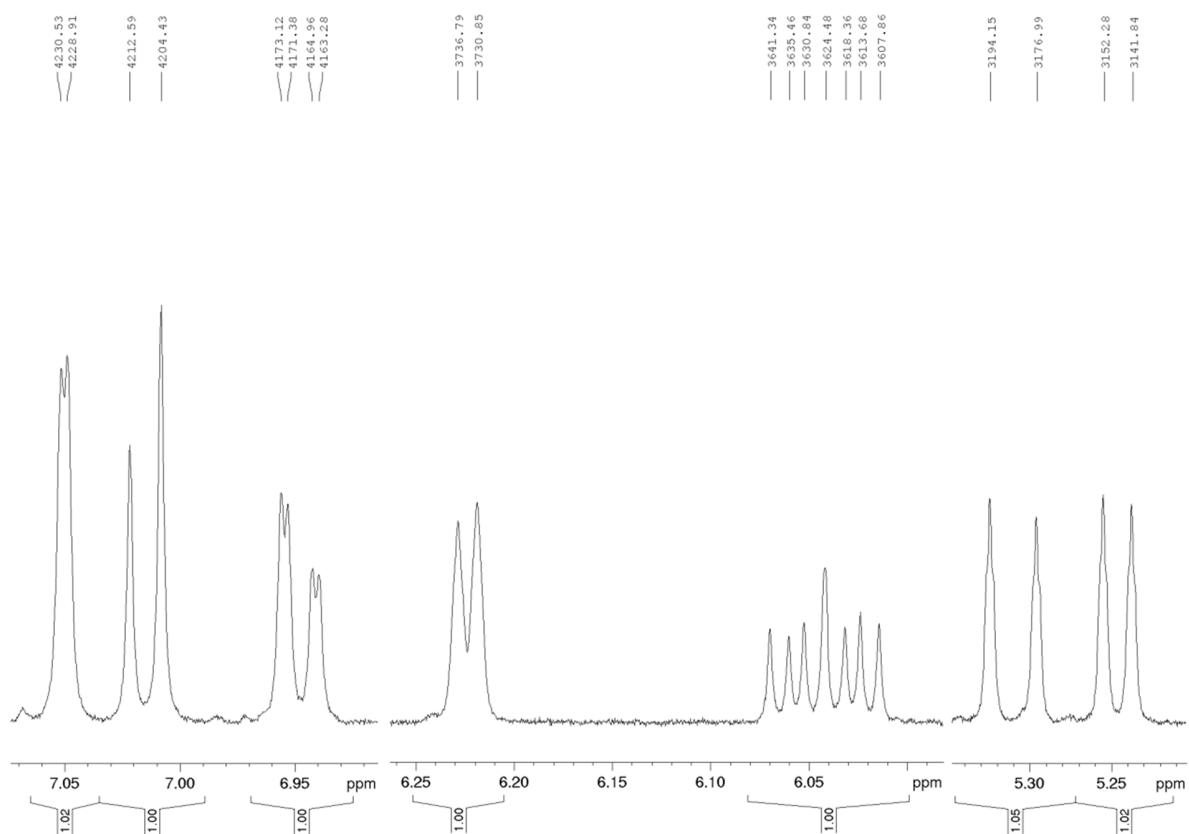

**Figure S40.** Selected  $^1\text{H}$  NMR spectral regions of 1'S-1'-acetoxyeugenol acetate (**10**) (methanol- $d_4$ )

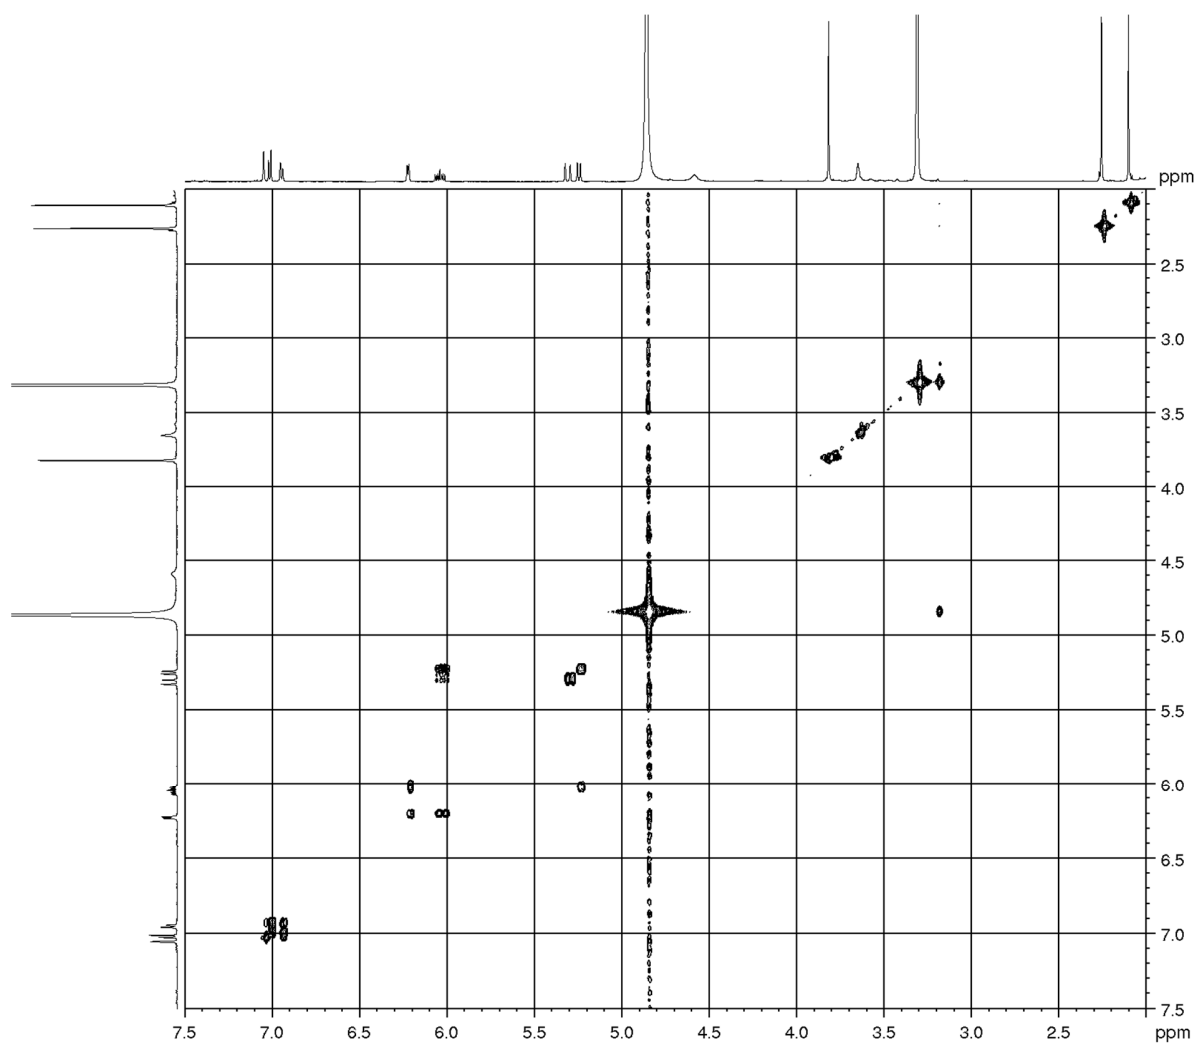

**Figure S41.** COSY spectrum of 1 'S'-1'-acetoxyeugenol acetate (**10**) (methanol-*d*<sub>4</sub>)

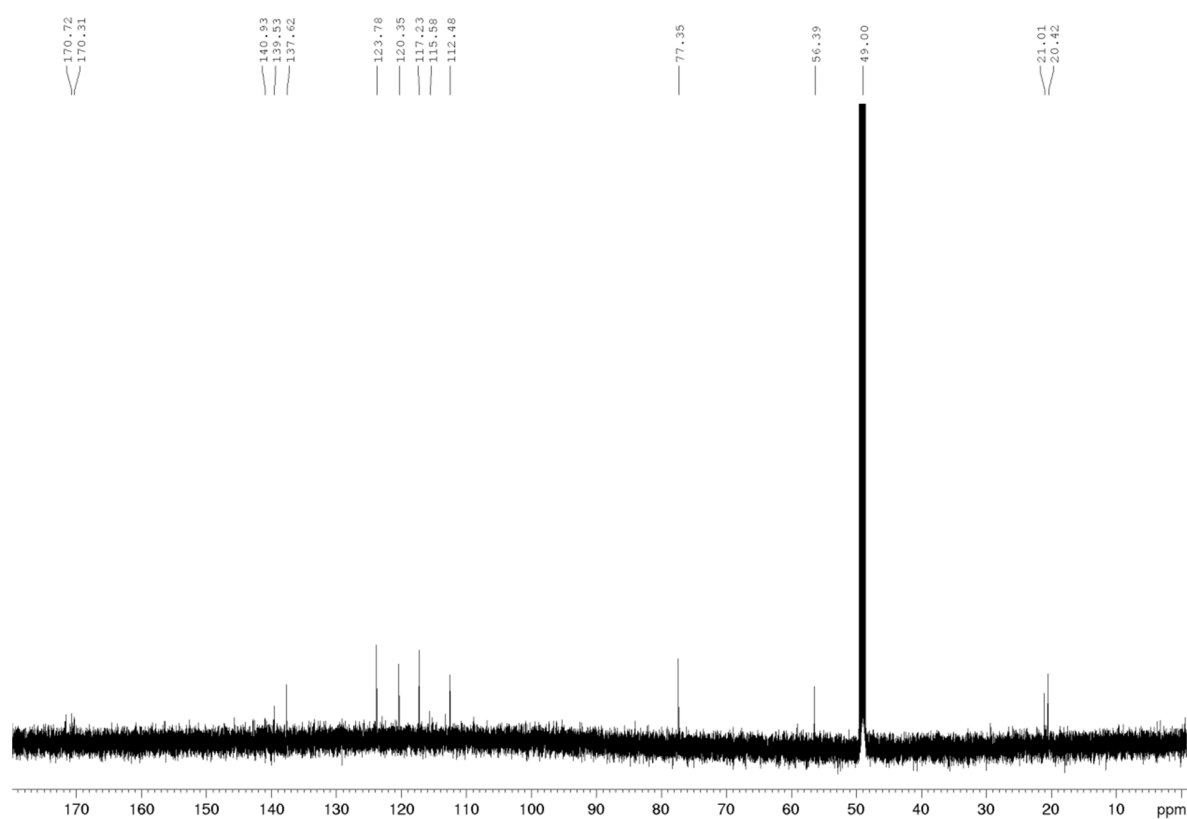

**Figure S42.**  $^{13}\text{C}$  NMR spectrum of 1'S-1'-acetoxyeugenol acetate (10) (methanol- $d_4$ )

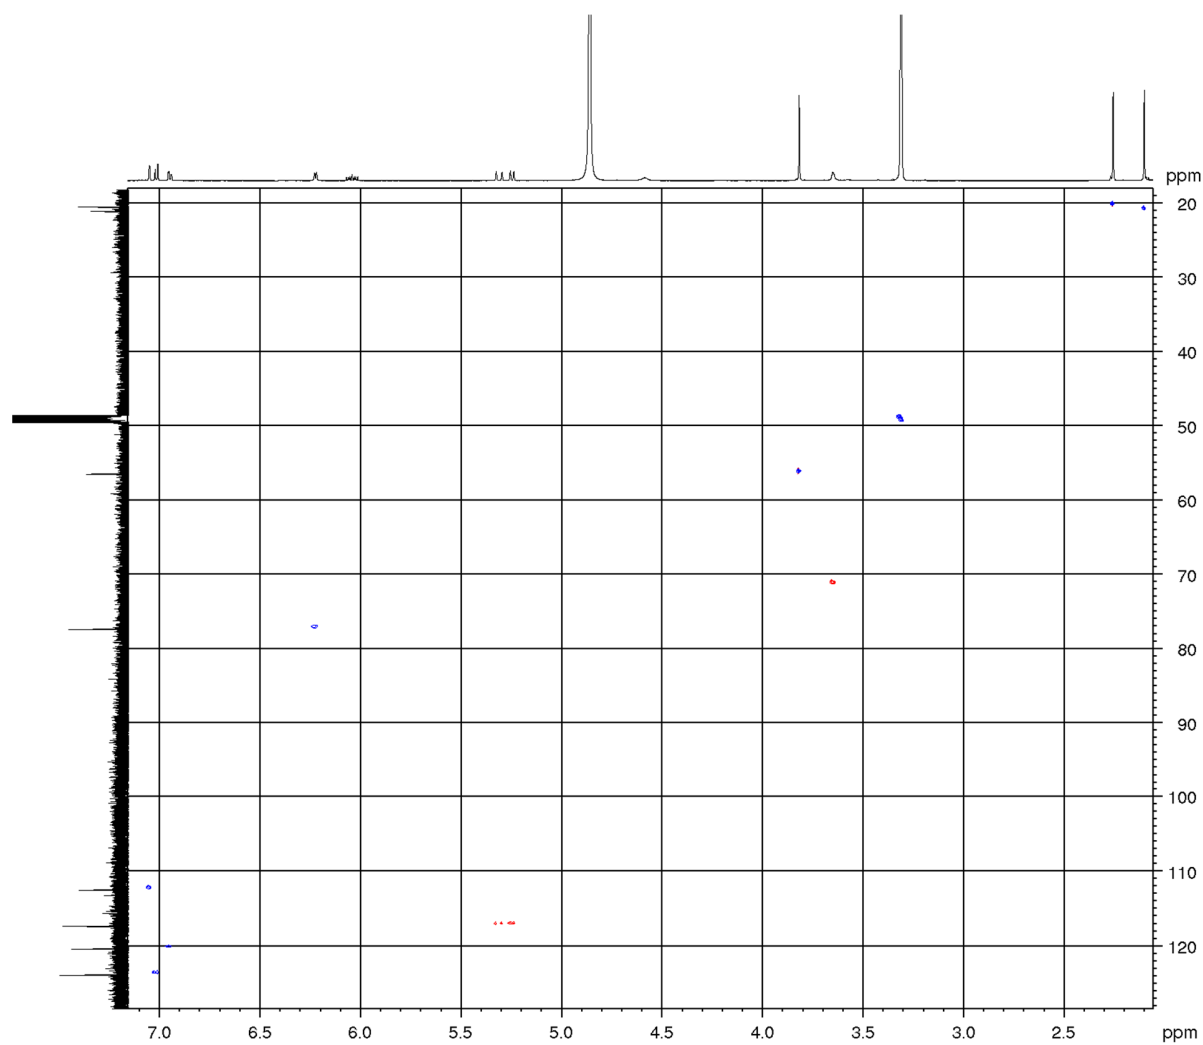

Figure S43. HSQC spectrum of 1 'S-1'-acetoxyeugenol acetate (**10**) (methanol- $d_4$ )



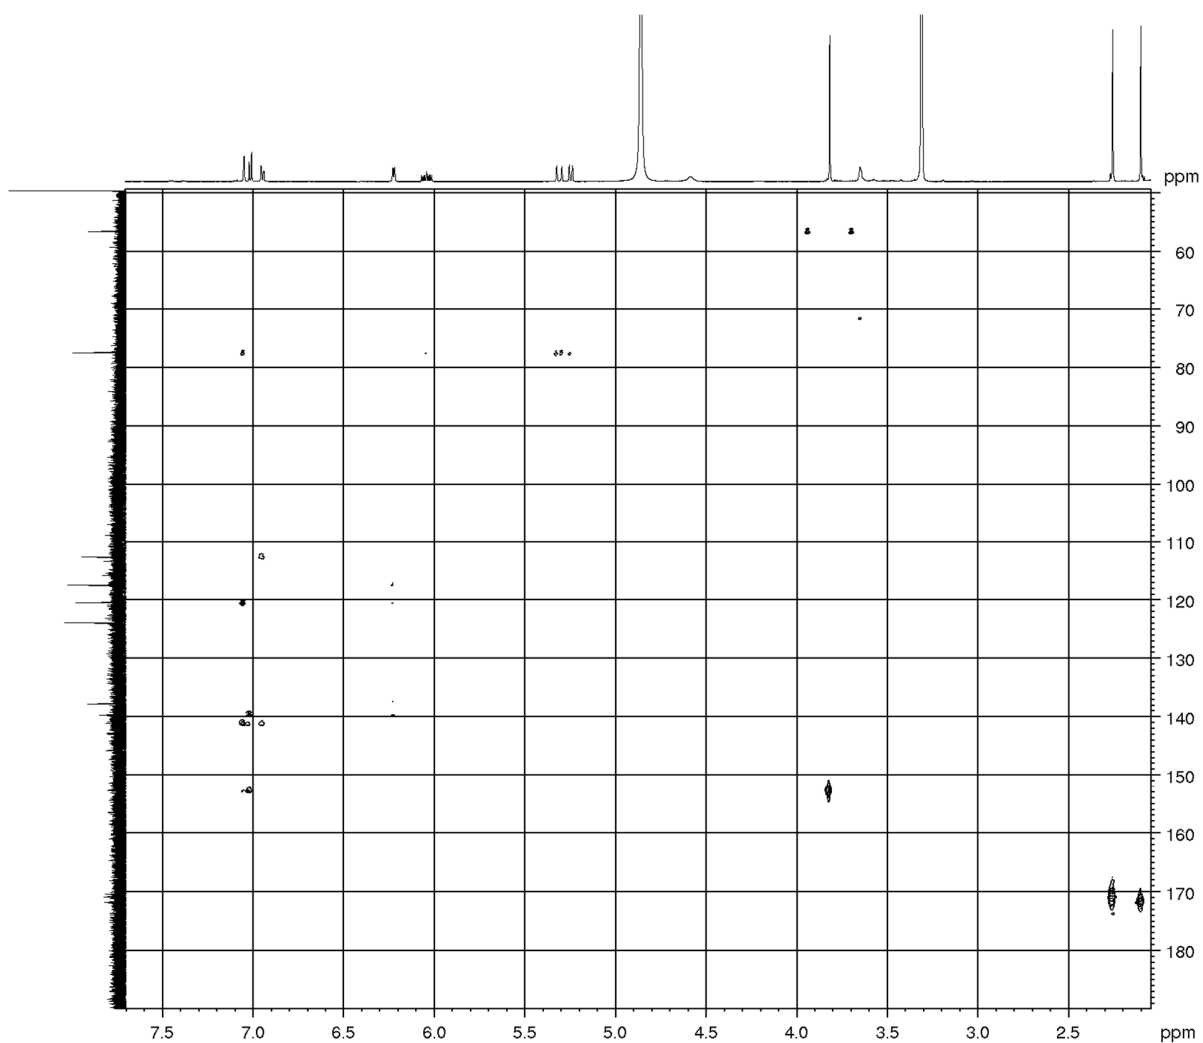

**Figure S44.** HMBC spectrum of 1'S-1'-acetoxyeugenol acetate (**10**) (methanol-*d*<sub>4</sub>)

## References

1. Morikawa, T.; Ando, S.; Matsuda, H.; Kataoka, S.; Muraoka, O.; Yoshikawa, M. Inhibitors of Nitric Oxide Production from the Rhizomes of *Alpinia galanga*: Structures of New 8-9' Linked Neolignans and Sesquineolignan. *Chemical & pharmaceutical bulletin* **2005**, *53*, 625-630, doi:10.1248/cpb.53.625.
